# Supplementary material for: Lack of support for Deuterostomia prompts reinterpretation of the first Bilateria
Source: PubMed Central journal article supplement (PMC7978419; doi:10.1126/sciadv.abe2741), 2021-03-19
Supplement: abe2741_SM.pdf [file abe2741_SM.pdf]

[advances.sciencemag.org/cgi/content/full/7/12/eabe2741/DC1](https://advances.sciencemag.org/cgi/content/full/7/12/eabe2741/DC1)

## Supplementary Materials for

### **Lack of support for Deuterostomia prompts reinterpretation of the first Bilateria**

Paschalia Kapli, Paschalis Natsidis, Daniel J. Leite, Maximilian Fursman, Nadia Jeffrie,  
Imran A. Rahman, Hervé Philippe, Richard R. Copley, Maximilian J. Telford\*

\*Corresponding author. Email: [m.telford@ucl.ac.uk](mailto:m.telford@ucl.ac.uk)

Published 19 March 2021, *Sci. Adv.* **7**, eabe2741 (2021)  
DOI: [10.1126/sciadv.abe2741](https://doi.org/10.1126/sciadv.abe2741)

#### **This PDF file includes:**

Supplementary Text  
Figs. S1 and S2  
Tables S1 to S4  
References

## Supplementary text: Results on deuterostome novelties

### Pharyngeal gene cluster

*Linkage of nkx2-1/2 to msxlx in Trichoplax:*

On scaffold NW\_002060943.1, NCBI *Trichoplax* genes, XP\_002107829.1, XP\_002107830.1, XP\_002107831.1 encoding nkx2-1/2 like homeoboxes are adjacent to likely msxlx ortholog XP\_002108628.1.

```
>Ta|XP_002107829.1 hypothetical protein TRIADDRAFT_9507, partial [Trichoplax adhaerens]
KRRILFTQMQVSELEKRFKRQRYLSAQEREHLAKLIDLTPQVKIWFQNHRYKCKRQF
>Ta|XP_002107830.1 hypothetical protein TRIADDRAFT_9561, partial [Trichoplax adhaerens]
KKKRRILFTKNQTDQLEKRFQKQYLSAPEREHLANMIKLTPQVKIWFQNHRYKCKRQ
>Ta|XP_002107831.1 hypothetical protein TRIADDRAFT_9531, partial [Trichoplax adhaerens]
RRRILFSSQQVEVLQNRQINIYLSPIEREQLARKLHLSPKQVKVWFQNRQYKRRKK
>Ta|XP_002108628.1 hypothetical protein TRIADDRAFT_51739 [Trichoplax adhaerens]
MVAKREKVKNNKSNACKCHRLGQSCPTLTEKPKDEKNFQTFDSKEPIANKFTAPTTMPF
SVDRILGFANSTVAPMAIDPNYAYRNSYNPNDFRYTYPAPYFGLGRLDWLQTNPHFTPV
TVKNDNSNEDGQKNCTQKKRRISRCPRIPFSKDQLNLMEDVFQQQYLSPRDIENLCRKL
DLKEHRVKNWFQNRAREKRARTSSSITVLTNQYETSPDSKKNVNSNETVTPTANPMYLT
YTPNPSKNALQDNRWLVTIPEKIQNIDQHKD
```

*Linkage of nkx2-1/2 to msxlx and foxA in the octocoral Xenia sp.:*

The octocoral *Xenia sp.* encodes likely orthologs of several pharyngeal cluster genes on the same scaffold, within around 100 genes (0.7Mb) of each other for the core transcription factors:

```
HiC_scaffold_25 5648642 Xe_021979 # pharyngeal mipol-like
HiC_scaffold_25 5749435 Xe_022000 Forkhead:HNF_C # pharyngeal foxa-like
HiC_scaffold_25 5760896 Xe_022001 Forkhead:HNF_C # pharyngeal foxa-like
HiC_scaffold_25 6073776 Xe_022051 Homeobox # pharyngeal nk2-like
HiC_scaffold_25 6459615 Xe_022099 Homeobox # pharyngeal msxlx-like
```

```
>Xe_022000-T1 Xe_022000
MMDSLLTSDYLQDPLDPKARQVKDEKESMTSRRNFTHAKPPYSYISLITMAIQQSPNKML
TLSEIYQFIMDLFPYYRANQQRWQNSIRHSLSFNDCFVKVPRSPDRPGKGSYWLHPDCG
NMFENGCYLRRQKRFKADKKPNLNHLVKPGPYVPGVPKVQGGKTFATPSFLAPTHYGGFR
PGFNHPFAIKNIIADHEMDFRGYDSMHFNPHYHSGSLSTPPPVPAMSPMSSFGLPKTTLDP
PSLMTSDANLTPYYPSCGYINTSSSCSLSGYT
>Xe_022051-T1 Xe_022051
MSNSANGVHSIENILETCERKKLSQQLTTTRKIQCFCFVLSVQSAIEPCGLPNDKDVSK
EISFDYSIESGVQKKRTKNNEINTFTVRTPSHINTEQTSHEIEKNTSSRKKTKAKKRVL
FTRAQVFELEERRFRVQKYLSAVEREQLAKVTNLTPQIKVWYQNHRYKKNKKQNIRETAET
EKLWDFYEYGRNRQLINQMFQNMNSTSSSATLNNISHDNMQ
>Xe_022099-T1 Xe_022099
MYLKIQAESFLIILYTLQEFNWILKRFAIQPQPFWLRTVGRKKTQYEEKNKAILQPFHT
LHNSPRESSKRRPKQKRKPGRNPRVPFTPKQLTTLENKFETMKYLTSDVRSCLCLVLT
PENKIKIWFQNRAREKRKSSQSSDEYVDVMTIDGENS
```

(Data downloaded from: <http://cmo.carnegiescience.edu/data/>)

### *Linkage of msxlx and pax1/9 in Phoronis australis:*

Phylogenetic analysis identified g118.t1 as msxlx and g100.t1 as pax1/9, both encoded on ‘scaffold1’ (annotation file: 51\_pau\_v2.gff). There are 17 intervening genes but 3 of these have no database hits in the NCBI NR protein database.

>Palg100.t1

```
MDQAFGEVNQLGGVFNNGRPLPNAIRLRIVEMAQLGVRPCDISRQLRVSHGCVSKILARY
HETGSILPGAIGGSKPRVTTTPNVVVKHIKMYKERDPGIFAWEIRDKLLSDGVCDKFNVPVSV
SSISRILRNKLGSIQQQFDYPYKDSKPLYNLYPYSCASGGPPLSPGNNLVSQPQNVNMPP
MAKPTNHPSAVMRWPPSSHAMNNILGLRQSCNQAQENSCMLNPNPYKHHD SGQYNYHMPST
VPSMYLQS
```

>Palg118.t1

```
MALLNSLYGPGKYPAFYMSHGNYKNFYANLVQGLGMPPTNYDLTRVQLARKPEMAAATS
YQLRIPSPGQRKPSPRATSTGVVESEKHS AETVDKNLIKPSQNPLTNFSIEGILGRKET
VTSESEDAYDDDEEENEGITDKDDGIHNISRDSNVESES VNLDQRNSLEKDNIDETEFS
WLQCTRYKPPKLPRSRKREGVKKRKLGRNPRVPFTQQQVGILEQKFRQTHYLSSVDVLEL
STALNLTETRVKIWFQNRARERRDRACKTNPVHRPPQNASSAAGSSLSPYHGAIPWPL
PLPPNPTTLAQFSQALQYGPMSAFSPVFIYTSQPHLAASPFTFYRVPEAKE
```

(Data downloaded from: [https://marinegenomics.oist.jp/pau\\_v2/viewer/download?project\\_id=51](https://marinegenomics.oist.jp/pau_v2/viewer/download?project_id=51))

We find no evidence for pax1/9 orthologs outside of the Bilateria (in the context of our analysis, cnidarians or *Trichoplax*).

### **Gene novelties**

We examined the 31 genes / gene families highlighted as deuterostome novelties in the supplementary information of Simakov et al. to test their status in light of new sequence resources. Our primary consideration has been the identification of candidate orthologs within protostome and non-bilaterian animal sequence sets. Identification of such sequences leads to the inference that the gene was present in the common ancestor of protostomes and deuterostomes (i.e. Urbilateria). Simakov et al. classify some genes as deuterostome specific, despite having non-bilaterian animal representatives, as a consequence of inferred loss within protostomes. Such genes are plesiomorphic with respect to Bilateria and therefore unsuitable as markers of deuterostome monophyly. We recognise that demonstrating deuterostome monophyly was not the purpose of Simakov et al. in gathering these data.

In the “Novel aspects of TGFbeta signaling genes in deuterostomes” category of Simakov et al, there is good evidence of urbilaterian ancestry for 3 out of 5 of their examples, with a potential fourth dependent on the precise timing of a gene duplication event (for which no evidence is available). In their “Sialo-glycoproteins and the evolution of muco-ciliary filter feeding” category, out of 7 examples, we consider 6 likely present in Urbilateria. In the category “Deuterostome novelties for physiological-metabolic specializations” at least 10 out of 14 examples were likely present in Urbilateria with a further example likely hemichordate, rather

than deuterostome, specific. Finally of the 5 examples in “Deuterostome novelties without eukaryotic or prokaryotic homologs”, we identify one that was likely present in Urbilateria.

s

We review our reasoning below. Homoscleromorph (*Plakina*, *Corticium*) sponge transcriptomes were assembled from reads using the methods described, and we provide example sequences from these assemblies where relevant. We report bit scores as these do not vary with database size (scores from blastp, see methods). All hits were statistically significant ( $P < 0.001$ ) unless otherwise noted. Section headings refer to human gene names, with multiple paralogs indicated in parentheses. Genes are presented with the same section numbering as Simakov et al.

Species abbreviations:

Sponges: P\_jan *Plakina jani*, C\_can *Corticium candelabrum*, O\_car *Oscarella*, Aq *Amphimedon queenslandica*

Cnidarians: Ep *Exaiptasia pallida*, Of *Orbicella faveolata*, Pd *Pocillopora damicornis*

Protostomes: La *Lingula anatina*, Pa *Phoronis australis*, Pc *Priapulid caudatus*

Sequences can be retrieved via the accessions at the NCBI, excepting the homoscleromorph sponges.

## Novel aspects of TGFbeta signaling genes in deuterostomes

### 1. LEFTY (1,2)

The LEFTY protein is composed of a pro-peptide and TGF- $\beta$  signalling domain. Simakov et al. reported the existence of a lophotrochozoan ortholog of the LEFTY pro-peptide lacking the signalling domain (and we thus infer its presence in Urbilateria). In agreement with them we were unable to identify protostome or non-bilaterian LEFTY signalling domain orthologs.

*Our assessment:* deuterostome specific (signalling domain only).

### 2. GDF1/Univin

Blast searches and phylogenetic analysis revealed an ortholog in the protostome brachiopod *Lingula anatina* (in a similar tandem duplication arrangement with BMP2/4 to that discussed by Simakov *et al.*). The presence in *Lingula* has also been noted by Luo and co-workers (43).

*Our assessment:* present in Urbilateria, because present in protostomes and deuterostomes.

*Example sequence:*

```
>La|919024921 ref|XP_013396302.1| PREDICTED: univin-like [Lingula anatina]
MQLPDSPPGGGVCYLFLFMAVRLSSTAVGLQTAIKMHQGAILRGHTTVDGEEHLETAHLV
QSDISHRSRQHDDELKMLKLFGLSERPSPKPNSTVPGFMYQLYEKVRLSEERDQARCHFSD
QSIPGNVIRSLRNKGPPKQDLRFHPNGVRIFFNLSVVPALSVTRAELRIESSQLTKQD
RAENSOQCKKISIIYQIRRTLNIIRISSIDSLHLKHISVVFEFELNTENDSLDSWQSPDLIEI
VKFWSNPSTKNHGLYLLHEPLENSVENRDSLCSNLESSSISLLVVTSDTSKCHHRVRS
KPTINFARSNLCRRHALFIDFKDVGWAKWIIISPVVYQAYRCQGDCCPFLNEHLNGTNHAI
IQNLVNSMYPSTVPRACCAPTHLSAMSMLYFDNHDNVVLRKYEDMIVDSCGCH
```

### 3. TGFB (1,2,3)

The discussion of Simakov et al. notes the presence of sponge and anthozoan sequences and that deuterostome TGFb2 genes were “likely derived from a bilaterian ancestral sequence”. In agreement with them, we identified orthologs of TGFB1/2/3 in anthozoans and sponges.

*Our assessment:* present in Urbliateria, because present in deuterostomes and non-bilaterian animals.

*Example sequences:*

```
>Ep|XP_020915263.1 transforming growth factor beta-2-like [Exaiptasia pallida]
MFLISCFSKALLLLAVCQDLGMFFVNGKSRLKESRIQAVRGQILTKLGLTSPPEGARVR
PKREELEAFKAVRNEAFQHQNVDENCIRNDKSASYFAKSIIVSLHLVQRTGKTIQYEDPAK
KRVHIVDINTLTFDATQLDGEHHIEKAEMRIDPNYFPTIQGTTIKACMVDRLSSSSIHNT
CSQVLDSEKIDSQADINLDVTDVAVKKRXPAPKSMFAFVKVIQXGMEQNGYDSSSTLSWEPY
VLVWYIPMNRYSIERRRRHRRSLDLAFCNQRPTEKRCCLRSLYIDFQKDLKWNWIHAPLG
FHANYCKGTCPFLWGSSNQTHHTSIMALYNSINPNAPSEPCCVASSYKPLVILHYVKGQP
KIEQLNNMVVTSCTCL
>Of|XP_020607064.1 transforming growth factor beta-1-like [Orbicella
faveolata]
MSLLSSQMLGTFPLYVWFLIWMNVVGVAFITGCKTCNSRQAREKRLIAVQGQILAKLGLT
KPPNGEEIFMNVSREVMQTYKSAVQEKDKLLLESKLCRSQVDADEEYFAKRVERLLLEKE
VARTVVP SKYAKLRLSTCPKGGKNDKDVYSLIFNLSKLVTESARVSLAELRLYQMPNQRP
LSNVRIDVCENTGEHDDNAKNGCITALDSAWSLSSEEKWFSDITSVQKWLSDSSTNYG
LTVTVTSSVPADKDERVSP IYLGGPAPKQMHDEDEEPWPNILVWFIPRERVHSTRRRNKR
SLDSNYCKKRSTETRCCLRSLYIDFKKDLRWKWLHAPKGFYANYCAGHCPLMWGVEKQNH
HTTMSLYNKINPDAPGDPCCVPKTYEPLVVLYFKDGEPKIDELSNMAVSECTCL
```

### 4. THBS (1,2)

Simakov et al. note the presence of a sponge sequence with similarity to the N-terminal half of THBS1/2 and note that “it may reflect a metazoan sequence that persisted through the bilaterian ancestor to the deuterostome stem”. We agree with this, and identified further sponge genes including VWc, TSP1, TSP3 and repeats and other relevant domains.

*Our assessment:* present in Urbilateria, because present in deuterostomes and non-bilaterian animals.

*Example sequence:*

```
>P_jan|DN485_c0_g1_i9.p1
MIGDGEISTSRATLAALLGFAAVLFAFLTGTVDAESPLEELNVLEEAGLSPSIALQTPR
VAYELHAGMPPVYHLDAPDKVFRVNSEQTERFATAVEKNKGFTFVANIQPAHGNNKGILV
SLDEPMSYRPAYLRCLCYDGRMRKFLIEYSTKGNVMTWFRDVLHSTQOMNRIVLVVHHLN
VMLYVNCRFVATAKLQGP I HATPLSERAEFRLGRTTAKIWSQPPYKGGIQEMKFLFKDMS
PEVLGSSCSIIEKTTYLKGLVAMNGCEYCPFVSQQLVDVVFQAMSTHLDDLKRLQLRVRTN
PASKDTPTEEGSCRDSRGRFYHSETWAPSPCRNCSYRGNITCLDTVCPKMDCDIFYQ
LPGQCCPSCWSALREPLPDDFVDHNNNDINNRADVAVTWSDWGIWGLCSKSCGGGKQKMR
```

NCNKITGYPPGGHDCLGQMLETRVCNTYYCPIDGGWSNWTDWSPCSVSCEVGTQVRARRCD  
NPVPAVDGVSICIGDDRETRACVLLLEKCP TPCSPNFCFKGIVNCTEHGKIYQCGPCPVGYQ  
GDGIHCRDLNECKLVPEACHPLASCKNKRPGYACSSCPAGYRGNRLKGI GLEDARTKRQV  
CKDIDECAKNNGGCRHSPCINTIGSYHCGPCDPGYSREGRADGQCILVNVCP LGWHNCTG  
NFKCQPAGNLSFVCVCP EIGHFFKDGMCIRD TIDGYPDSAIDGCVEKWCKKDNCP TVPN  
SGQEDHDNDGLGDACDDDDNDG IKDSKDNCP LLRNVKQSD LDRDGVGDLC DN CVRTRNP  
YQQDFDHDGLGNACDPDPDQDGIFTGVDNCP LARNEEQEDFDHDHVGDNCDNCPYDVNTN  
QGDRDFDMVGDVCDTDIDSDGDGIQDDLDICRYQRNADQANHDS DAHGDLCDSDDDDDGF  
PDNQDNCP LVKNSKQEDINGNGIGDL CENDYDGD SFANDIDVCPYNREIDRVDFLMFDQV  
ALRYRKEPWWRVLANGAEI IQERVSSAGLAVGYHKFSNVDFNGTFFVNTDSRDDYFGFVF  
SYQSNKRFYVVMWKKSKENYPSSKVSTALPGIQIKVVNSASGPSTALERALWHTGTTPRQ  
VRLWLHDPKQIPWRSHTAYRWMLTHNAENGRIRLRIYDAGEEIIDTGYLVDRTL RGGRLG  
FFALQQSQVFWSDLSYRCSGNVTDVDECSSILI

## 5. TGFBR2

TGFBR2 orthologs are present in Ambulacraria and Chordata. These are paralogous to Activin receptors. The TGFBR2 ectodomain sequence is similar to the extracellular domain of Activin receptors. Although this is not statistically significant, neither is the similarity between, for instance the human TGFBR2 ectodomain and that of *Saccoglossus* or *Strongylocentrotus* orthologs, with a blast search of the human TGFBR2 ectodomain returning no significant non-chordate hits.

*Our assessment:* similar sequences were clearly present in Urbilateria. Deuterostome specificity depends on the precise timing of a gene duplication event, with deuterostome specificity (if this occurred on the deuterostome stem) or protostome loss (if origin on bilaterian stem).

## Sialo-glycoproteins and the evolution of muco-ciliary filter feeding

## 6. GNE

We identified homoscleromorph sponge orthologs of GNE, with the best hit of human GNE to our sponge sequence database scoring 863 bits, and the best hit to bacteria scoring 318 bits.

*Our assessment:* present in Urbilateria, because present in deuterostomes and non-bilaterian animals.

*Example sequence:*

```
>C_can|DN12602_c0_g1_i3.p1  
MDANNVQRRQIKVCIATCNRADYSKLEPVMAGIQADPDMELSVIVLGSHLIDDYGSTHR  
FISADGFSITQKLHTIVRGEDEAAMVESVGLSLVKLPDVLRYRLDPDLLVHGD RFDALAL  
ATSAALMNYRILHLEGGEVSGTIDDSIRHAITKLAHYHACCTERARQRLIAMCESPSRVL  
LSGCP SYDKLLRADTSSLERVCHRYQVDPNDFLIVIQHPVTTNQVESQKMF SVMVDAVIE  
FNHSTLFLFPNV DAGSKDLTRIMRRRGLESHGQHPNISTIKHIPFDEFMILLSKCKCIVG  
NSSAGVREAGAFGTPVVNVGSRQTGRETGENVVHVRDADSKEKVLRALQLQY GKRYPPSH  
IYGDGRICIPRILQFIKEIPFKSGIQKGFNFPAMPASSQDIDHILEIQSAL AIDMGGTNL  
RVAIVDLRGQIVYYTKVPNPPVFEERIDVLAALISDAKKKAVEHDCRLLGIGISTGGRVD  
PKEGALLDATSLIHDSYVNL RALLSSKVELPVWVDNDGNCAAQGERRFGKGGQGVKDCIT  
VIAGTGIGGGIILNGEVQYGSTFCAAELGHVVVSM DGPLCSCGQHGCVEAYAGGATLDRE
```

AKSLHEAGELNDFLEADREVSGVHLTAAAKLGNVNAEKIVRRAGTALGTAITSMLHVVP  
SHVILCGHLAPVYYNYVKAVIQQRALP SARKVEIVVSEISDPALLGAASLVDYSIRRIY  
GNSH

## 7. CMAH

We identified homoscleromorph sponge orthologs of CMAH, with the best hit of mouse CMAH to our sponge sequence database scoring 596 bits, and the best hit to bacteria scoring 219 bits. (Note this gene is absent in human).

*Our assessment:* present in Urbilateria, because present in deuterostomes and non-bilaterian animals.

*Example sequence:*

```
>P_jan|DN16311_c0_g1_i2.p1
MTASGSDRSLLLLTSLKDIVDTLKPQVITQTLNKHGILLYRSKGEDLKL RACKNVCHHQEG
TFIKDIESLTADACSSVVRCTKHGWKLDMATMEYINPPDCFTQEELLVEEDGKGNINLYQ
RIRPQQPWEEKDGRPAQTIHAGEVKITYFTHACVEMNFDGTIFFTDPWLTGPAFARGWWM
HEPPADWLDRLSKASLIYISHLHPDHL SYPTLKMLYQRNPHIPIYVGNATLPLFSRQHCY
GDEAYNVIVCELATWQEVSEDLRFMIMHDGIHTEMDCLLIDYKGHLIMNTVDCSRPNDN
MLPKDVDLLMSDFAGGATGYPVSFYGGCYAEWKRNF IQSERKKEINRKVAMAKKVNPM
YLPFAGYFTEAHP SDEYIKERNRKN DPAVLNALLNKYAPNVQ TWT PKPGAWVDLATLEVT
DPP IETPVFKTQWNFDLYTKLIDENIKFVFPQHPDS IHFYFQWVGLKDYNLVL RV IETDE
EFEKDPNGFDVLDLQDV SFPSERPTRQHNYIEMKARIGVFRET M KFGYLWDNLYLGFQC
RLTREPDV FHFNFWNHMQ LLLPSTPPDWAKFWKSKGGRVEELNGPRYMLPDL LPN
```

## 8. ST6GALNAC (3,4,5,6):

We identified homoscleromorph sponge orthologs of ST6GALNACs, with the best hit of human ST6GALNAC4 to our sponge sequence database scoring 214 bits, and the best hit to bacteria scoring 59.3 bits.

*Our assessment:* present in Urbilateria, because present in deuterostomes and non-bilaterian animals.

*Example sequences:*

```
>P_jan|DN13518_c0_g4_i1.p1
KARIMLM LRLRPALALFLFLFAGIGIFIQWLRTRGDGVHDSKASLLTISESTSSQLQRD
LEVGVRVTTQISNRQTEAHPDINHNNPSIGDPQST SLEQRVPDTGVKEAKLTNSLKAQT
QANAEE TKSDNAVHQLLSPNAVAPVPAEGILHDKLTVLPGYISVLDDQPLKLNCKTCALV
SSSGRILGKKKGSEIDQADCVFRMNSAPVEGFETDVGHKTTVRLLSQF SVP HGLRLVSHH
TDQPLNFFIAWGAEGHLGKKTQKYGMMLETAKKYPAMGIYRS S DKHYWYQDEVFQAETGQ
ERMKSGTWLSTGWFTFDVIKQACPRTKIYGMIPETFCRNGSAPPALYHYWERNAGDECSY
YRQMENRVRAAHRFMSEKTVFARWAIKYNMTFHVPDWDPKDYSHSEIKFPTFLS*
>O_car|m.311493
MLNRRISIALVALFGAVVLLWKLNSMGNTQIVDNDN LLENLQVSTGLEETMTNLK KATE
RPVVVHASHSSASTEIKVASTNSGYPMMLNGYRSIIDPNEPLKMNCTTCSLVSSSGRILG
QSKGAEIDGADCVLRMNIAPVKGYEGDVGKRRTTARILSQFSVKFARNQLLAAENLRYFIA
```

```

WGGNVHLGQKTANYKKMLEKAIQLPNIGFFRSSEEYYWYQDKVFENITGRPRQKSGTWLS
TGWFTFDVIKNACKRTKVYGMIPFVFCRDP TAPKALYHYWDPNAGDECAYYSRMENMRAG
AHRFMTEKAI FARWALQHSITFHSPDWDPKLTHTAHHKF*
>C_can|DN7762_c0_g2_i1.p1
MSRTMTYRLFRPRPIVALGLFVLAGSGILIQWLRFRSPSEGEKAPKSSSEDEL PQSLRQNI
GSDGGKRTENDELQEKTTTTENRVLHTAGQNSLVNQNKGKTPDMDVVIDSKPAESEKSNNA
DLESEERESLETRDRPAVLNGYMSVLDDKPLTLNCKSCALVSSSGRVLGQKKGSEIDEAD
CVFRMNAAPAKGFEIDVGHKTTIRVLSQFSVAAGITQIIRGQESLSFFISWGADKHLGKT
TSKYREMVSTANKYPQIGFYRSSNEHYWYQDEIFEKETGQKRMSSGSWLTTGWFTFDVMK
QACPTTKIYGMVPEDFCCKNPKAVPALYHYWEPRGGMECSYYAKMENNRRGAHRFMSEKTI
FARWAVKHNMTFHSPDWPNPDYIKKDIKFPMP

```

## 9. ST3GAL (1,2):

We identified homoscleromorph sponge orthologs of ST3GALs (in common with Petit et al., 2015 (44) and Simakov et al., 2017 (16)), although with representatives from multiple independently sequenced species. The best hit of human ST3GAL1 to our sponge sequence database scored 236 bits, and the best hit to bacteria scored 71.6 bits. Sponge sequences searched against the NCBI NR database retrieve vertebrates as best hits, suggesting all animal sequences form a clade.

*Our assessment:* present in Urbilateria, because present in deuterostomes and non-bilaterian animals.

*Example sequences:*

```

>O_car|m.10828
FAPESWNRRTFRFLCMVHKIMPRCRFVSFSIFL FVIMAI FVFIRHQTSWEESVSLEDPM
RSQPAVKPEETKQDPAGKPKETKQDPAGKAEAEEDYPRRDSTICPNIGTLLANPNLPRIL
KSKFHPDVKVMLTQDTKTLDPEIN SWWKKLQPF DNKRDFTELAEDLFTVIPGENPFSPGV
CRRCAVVG TAGRLKGARQGLIDSFDIVIRMNRS PVKGYEVDVGSKTSYHLVYPESAVGY
RGAESSGKLVLFPFKVL DIEWLKSIFTTHPISKGWTHLPTNLGLKPTDAMVIHPEFIYYV
AKTWLEGKGRWASAGALS VVWALHICNEVDVFGFGANKYGNWDHYEKFSSKEKDPFRRT
GVHDANIEETVRMELHKEKII RFHPGNPA*
>C_can|DN3691_c0_g1_i6.p1
MNNAPVKGYEKDVGKTTTHHIVYPESARFYRGFRSSGKLVLLPFKLLDIEWLISTLTTHH
ISRGWTA VP THLDLTGKDAMVIHPEFLYYARHTWYESQGRWPSAGALAI VWAIHICDEVD
VFGFGRNRFGNFHHY YEKVERTGKDPFRQTGVHNADIEEQVRAALDKGGAIRFHPGT*
>P_jan|DN4107_c0_g1_i3.p1
MNTAPVRGYEKDIGSKTTTHHIVYPESAKNYRGAQSSGKLVLMFPFKLLDIQWLISIFTTHN
ISRGWTSVPTRLALTGKDAMVVHPEFIYYVRHTWYESRGRWASAGGF AIIWALHICDEVD
VFGFGRNQYGNWAHYDYK FVSTGTDPFRRTGVHDADREEVRLALTKAAVIQFHAGK*

```

## 10. ST8SIA (1,2,3,4,5,6)

We could not identify clear non-deuterostome equivalents of these genes.

*Our assessment:* subfamily specific to deuterostomes.

## 11. B4GALNT (1,2)



We identified likely orthologs of B4GALNTs in homoscleromorph sponges, with the best hit of human B4GALNT1 to our sponge sequence database scoring 213 bits, and the best hit to bacteria scoring 118 bits.

*Our assessment:* present in Urbilateria, because present in deuterostomes and non-bilaterian animals.

*Example sequences:*

```
>P_jan|DN3489_c0_g2_i4.p1
MARRPIVVRKYWRTVFGVTCITLLFWVSFRLVSLLSYMVSLDPKDWEGKRDGCSCPN
HTAAEVLKESQKLRNFAFERWQQREKIVRPSPLAVCPSDSPLQFVSSGLEIEPMQSI
LAGLAVKTSKGSILYWNPNVELTFTSVRGGFVLLLSRLRVTVDGNSTQRM TLSVTGD
TRKLKALNIVLKGVLVYQSTVAVYDEWDTIEIRFIDSVVHMHIRIRRQPLPYLYKTSS
VSPPIHERVTIVTKTFERYNKLNRFDVSVFKFYPSMTIIVADDSVHFQTVKKTNVL
HYEMPPQMGWFAGRNLAAASQVKTEYLVWADDDVFVNEKTKLELFMEKLDKVELGL
DLVSGHVGTNGYCGTCILLGKNNEHCVTVMGSCNRGPVRYGYPQCVQVDRPMNFF
MARTKSIQQIGFDPHFKNIGHSEFFMDGYHTLKSACCSDVSDVHDHIRGGSAFYMK
NRKIDGQLLADYRTYIAFKYNIRCLSIVT
>C_can|DN30744_c0_g1_i4.p1
MPISRSLTYNSIALVTALAFILFITTFIRLGLFDVQSARHCNRRIQLDGRTLDDTCL
LFNSTRSSLWGARVLQRLEDRRVAKGCSCSRALRLELQDDVLRIRKHEHNKWKGREK
FIGPRPLAFPCSDSPLQFPSTGIEIEPKQGVTLVGLAISASQTSYWD DTVVEIVFK
SMRGLGVLSLPRQSFYSFVRMNVVVRGNNTNRMTLSAQSRHALNLNVALKDLMYQST
VAVVNELETVSVSFLGNVFDIHIRIRRKRMPYLKRTSSVFPRIEERVTIATKTFERY
DKVIRLIDSVLKYYP SLTIIVADDSVNFRTIRKKNVLHYRMPPQIGWFAGRNLVVS
QVMTEYLVWVDDDFEFDKNTKLELFMEKLDRLDLRLDLVAGHVVS PGKTGSCGSC
LQVEMDREGYCVTVNRSCSLGPLD GYPQCVLVDRALNFFMARTKSVHEIGFDPHF
NHIIGHTSFFIDGYHTLRSACCSDVSIGHF SAGSSPFYHQNRRI SGQELIKHQSY
ILFKYNMKCI SFV
```

## 12. NEU (1,2,3,4)

As stated by Simakov et al., cnidarian sequences indicate that NEU1 was present in the bilaterian ancestor. These sequences, and other sponge matches are distinct from the deuterostome NEU2/3/4 sequences. There is no way to date the split between NEU1 and NEU2/3/4, which could have occurred on the deuterostome or bilaterian stem. Using more sensitive hidden Markov model database searches initiated with the Pfam BNR\_2 model, we identified a couple of NEU related protein sequences in protostomes (see below), but with no clear relationship to deuterostome sequences beyond general family membership. Taken together with many sponge and choanoflagellate family members, this suggests a very dynamic history for the family in the animal lineage.

*Our assessment:* NEU1-like sequences were present in Urbilateria, because present in deuterostomes and non-bilaterian animals. Deuterostome specificity of the NEU2/3/4 sub-family depends on the precise timing of a gene duplication event, with deuterostome specificity (if this occurred on the deuterostome stem) or protostome loss (if origin on bilaterian stem), but NEU1 is a clear protostome loss.

## Protostome NEU-like sequences:

```
>La|919100968 ref|XP_013386852.1| PREDICTED: uncharacterized protein
LOC106156237 isoform X1 [Lingula anatina]
MPRLRRMESLSAYFSDGCRAQPLWFFMMVAVLPATTGKSF DGLLRRTTDGRYEAYMKPPY
KSNHASFIERLSNEDMVIWFSGSKEGESNVAIVFARLPNGTLQWMNPRTVSQRPGYSNQ
NPVLFADNNTLFLFHTQQKASFTSTCNSDVGSEDSAQVWALVSTDGKGEKFTKPKLVLSK
AGSFDRNRIIRSLKNEWLFPTYFAGGSSKDQHSILMENAKHDPYSSWVGHAFFPKSDYLVQ
PSVVRPVP GKPNLVVFFRDRRAGNIYRATSPDDGKTWTTPTKTTLPNNNSGIEANVLKSG
RIALVYNPTHARDPLVISLSE DQGKSWKYTRTLETSSSGKNVVEYSYPSLLQDTMARIH
VSYTYNRET VKHVIIPNEQWIMKTY
>XP_034309900.1 uncharacterized protein LOC105346535 isoform X1 [Crassostrea
gigas]
MINFRDFFWFLIFAITANADPKFDGVL RNASDGTMEAYMIPPFASNHASFIEPLNGDLV
MAWFSGTSEGESNVAIVFSQLKNNSDQWTKAQVVSQRKGYSNQNPVLFHDNKTDVLYLFH
SQQEAKKASAGIQSEDSAEI WVLSAKNVTNSTAIQFSPPRVMFKHKGSFDRNRVVVSLRN
TWLYPMYYAGGSSKDQTSNLKECVDHDFVSSWLDHPFTASNYLVQPSVVRPKKGNPRLIV
FFRDRRAQH VYRAESPDDGKTWTRPSKATLPNNNSGIEASVLS SGNLAIVYNPTTRDRNP
LSVSLSDDQGITWKYTRNLEYTKSSNGVEFSYPTLFDSSGRIHISYTFNRQTIKHRILP
NEQWIMQK
```

## Deuterostome novelties for physiological-metabolic specializations

### 13. PCSK9

Blast and other database search methods reveal strong hits to sponge sequences, although there are matches of comparable strength to bacteria. Phylogenetic analysis suggests all animal proteins similar to PCSK9 form a monophyletic group to the exclusion of bacteria. Simakov et al. also report this relationship with *Amphimedon* sequences, but discount it because of lack of conserved exon boundaries. While this and the presence of an additional ‘CUB’ domain suggest a degree of independent evolution, we consider it more conservative to hypothesize vertical descent, rather than horizontal gene transfer.

*Our assessment:* present in Urbilateria because present in deuterostomes and non-bilaterian animals.

*Example sequence:*

```
>Aq|XP_019849358.1 PREDICTED: uncharacterized protein LOC100638459 [Amphimedon
queenslandica]
MRSLQSNVKFMLLAALIYLILIKEKAEARRVIRAASGSNTTGNYIIIVVTDGVNHSRFMEI
VDQVRNETLDSKIYEQVEGPFINIISARITEDAAHRLKVM DGI EFVEEETYAVKSVSWAI
DRLDQTGPTLDNTYTP EGN GEGVDVYILD TG I K YSHNDFGGRAKYPGFDPVDTADGTNQN
GLDCDGHGTHVASLAVGTNWGVAKGADVYSVRVLDCEGSAPWSVIVNGV NKAGSRIVSSN
RSGVISM S LGGGYSHTLNSALISVMNKGVPVVAAGNERDDACNYSPASTTG VITVGGSA
KGD SLYYYTNGGTCVDVFAPGSQVTAADSSCNSCSVTYSGTSMATPIVSGSVAIHLQKNP
ALTPSQVRNKIIQDSLKNKLTYNLKNLSRGTANRLLHV KPAETVTVTSTSTTTQEV T
QIITSISHATVTQQVTRTTVSIVPTT VTSVSTSHVSITSTATVAVTAIVKTSVPVTVT V T
PTPTPEEVCCSTLRNFETFEVRMM SGLSDIVNKGVETIIERSSTSSNSTCEVKAPIDGNT
TTNGTKPQAVTKS CAEIIITSLPGASSGRYYLQSKDSKMNGSAAVYCELEKEIKGNRGM R
IANVNMSDPNTDCPEGLLLRTDGNLRTCQRHQFHSGCSTTSFSSSGVEYSRVCGRIRGYQ
```

WASPNAFYDITLYSSPKVEDDYVDGVVLTNQVNESRSHIWTFAAALDETRNKAIVCQCS  
NVNVTLNDFKTPSFGVNDYFCETGSRHQFSYGVLYTEDPLWDGKGCVKVSTCCDKGEWFC  
KDVPKTSSDIELRLCGNEDRNEDTPLDLIELYIQ

## 14. PADI

Blast searches initiated with human PADI1 and phylogenetic analysis revealed an ortholog in the protostome *Priapulus caudatus*. Searches against sponge sequences revealed hits to homoscleromorph sponges with comparable bit scores to bilaterians, and searches initiated with these sequences retrieved metazoan best hits. Other investigators have also recently reported PADI candidates in *Priapulus* (45).

*Our assessment:* present in Urbilateria, because present in deuterostomes, protostomes and non-bilaterian animals.

*Example sequences:*

```
>XP_014670183.1 PREDICTED: protein-arginine deiminase type-2-like isoform X2  
[Priapulus caudatus]  
MEGTSYLSERGPASRNEGVRTINLILNDVASAVVIVKTEICVRISSVAPEGAVRYGLVS  
DLGDITVKFREESVSGYGSEEDVAPVVVAYVHVATVSRQENDKRVEFLFYNVGDGEDL GK  
ADLHLTCVDIISLDVADRDGIVEKNSPHKNSWKWGRDGYGAVLLVNSDCETANETEMRDT  
DDELVNGPLDLLDMGRMMLRTDGPEQLPEGYSMQLYVDDKFADYVGVFYLTDTEAMMKN  
KHVIGPRQRAAEVLYPGMGGEVEFAVEGLSFPDRYFEGFLHIHLALFKDDVPIYEDMVQF  
RVAPWIMTPNTLEAEIVYVCDTRDNKHFVEKLRGFVEGLSGIQLVVCGLDGNRGDRWMQD  
EIELGYTEVPQRQPMVAVLDSPREGLCKFSQRQCLGPDFGYATRNTSRHKANSLDSFGN  
LEVSPVVKLNGKDFPLGRILIGNALTSSLKGRMMRVVNRFLYAQKVQPVIELFSDWLVN  
GHIDEFMTFVVPVPGSRQGFRLCLASPNKAYGILEKLQTDGHGDVVMFEGKRASRRSKQMK  
QETVSELLANQTLRAENKKFQAYIDFNRDILKRELGLEEGDIVDIP EIFINELDPKNETI  
EPQATSYPFDMVNMLVLGKNLAIPKPFPGVIDGECAFERYVRSALEPLGLSCYFLDDWYT  
YHLQGGEVHCGTNTKRKPFVSKWWDLDLPRMCQ
```

```
>P_jan|DN21170_c0_g1_i1.p1  
MALWDRIVRLRLETPRGSPSKSPEQEFVLTGTRLVVPFNGFYSAVPDGVVVKVRISASDGL  
NIKLPDSNKILEPDTLDYEQGAVMWVTSQSPSVNVGDRKVAHFHLDSSSKELAVAEIAIT  
VVRLSIHADVTRDGKVNFEKSVDKRSWKWGSAAASGGIGAILLVNNDRDGRRKKTDSDDSK  
INGPLDLADMSRIGLIMEGPEQLPENYRLVLHTNDTTSKQIRVFEFSRGGRSSTELIGPK  
RASKDVTRLWQKGRQLQAVEGLDYPDKGFSGSGYIHVSVEGSMTIFQDSFVFRMAPWI  
MTPNTLNPRKVYVAEMVDGDNFAIKELAALTKAAGVELEIVPSTLNRRDRWMQDEIELG  
YSQAPHKSLDVVLDSPRDRGLKQYPKMKLLGEDFGYVTRGDDPANSLSFGNLEVSPPLE  
GYPLGRIIFGGAADYAPWPGRRMMKEVREFLFAQQVQSPIELFSDWLGVGHVDEFMSFVP  
ADKGYKPKGFKLLLASPAACYKFLQELVRDGHGDKEMFEGKTRWNGEDATTTPKLLQDK  
RLRRENTTVQGYIDWNRDVLKRELELDESIDIPLALFIEDDDDRAGAYFPDMVNMLVLG  
GHLGIPKPFPGKVGGECAFEKHVNSLLNPLGLESYHIDDWDSYHNLSGEVHCGTNTLREP  
FEAKWEMESPQQQ*  
>C_can|DN15171_c0_g1_i2.p1  
MSLWDRVVRLRLNPIFATTDQAQKELLVIGNRLEVPFDFYSAVPADVTKVSVSWSHGLD  
VTLPDSNSTSEENVIDYNQGVVHVASRTPSETIGDRKVAFRFLDSSLTELATAQIAVTV  
IGLSIHADFTRDGKVNYSIDDKLTWKWGSNENGGIGAILLVNNDADGRRKKTVDVDDKI  
NGPLDFQDMSKIGVKMSGPKDLPHDYRILLHTNDTTSQKIRVFEFSRRGRTSSEVIGPAR  
SSKIDITRMWKGNKVELVVEGLDYPDIGFDGSGYIHLVIEDYMTIYQDSFVFRMAPWIM
```

TPNTLKPKKVFVAEMKSGDNSKFINELKQLVKAAGVPLEVVGPKLNKRDRWMQDEIELGY  
SSAPHKTF SVVLDSPRDRGLKKYPKS QLLGPDFGYVTRGGGKANS LDSFGNLEVSPVVEG  
YPLGRIIFGGPTDYYPERRMMKEVRDFLLAQRVQAPIQIFSDWLSVGHVDEFMSFVPADK  
SKYPKGFKMLLASPAACYKLLLEELIRDGHGDKKMFQGHRRWTSEDATTTANELVEDERLR  
RENKTIQGHIDWNRDVLKRELKLDSEDIIDL PALFTMEEGGAGAYFPDMVNLLVLDTHLG  
IPKPFPGPKVRGKCAFETHVNSLLNPLGLTCHYIDDWDSYHVLSGEVHC GTNTLRTPFEHK  
WWEIQPAARVE

## 15. FTO

We identified likely orthologs of FTO in homoscleromorph sponges, with the best hit of human FTO to our sponge sequence database scoring 214 bits. There were no significant hits to bacteria.

*Our assessment:* present in Urbilateria, because present in deuterostomes and non-bilaterian animals.

*Example sequences:*

```
>P_jan|DN32432_c0_g1_i1.p1
MKRRRLNRDEKSKRMKLLRELDKIGDYIEPEDQRYQELLDCSYHKLRVIPFNRTPPHL
HSKVQTSLSHLLLEAGYFTHNLVTKAKTLITPVTRFVAGKRGLTYPYLGLR LFAFPWETD
DTVKSDAEKSLCVLGELNDYMKATGDNMWSEGDVNRFNMTLVNYMDPGHVTIPLALEPYY
HMGMC AVRWHSDQNVQDNCSIGVYSHTVGETDQSV PWSIGLKIAWDVVTSSVKIPLPDGS
CYFLLHDMNMTHQHTVIVGDKPRFSSTHRV VILEGNTLEYI SERCRQAEATADRLNTEEF
LCPGDKLEVCLEIQREVEFQWIRQFWCLGMSNAKRHASFWLKHVEGMERTWENVEKAIKI
LYDRILDVTHNAKSQHKDFRSQSCDFTKIILHHLQ TREKNRQDWKRRYTAPVLCYLSQSD
LPVERPAFPRDHPHFYPYNSQAIETLGSQLRDQ*

>C_can|DN8123_c0_g1_i6.p1
MIFI IKKFKININKFTGHVICLLSGIRWQQKRRVVLSEDAKRSKKARLLRKL RDGVGQY
LEPQDEGYRELVSSAYNKFR LIPSHQTPLSLH SKVQLSL SCLLSSGYFMHNLVTKETKIL
LTPVTRFITGIRGLTYPYLGLR LFAFPWEFEGDPKSDVEKSLCVLRVLNDY MELKGNELC
GERGANEFNMTLVNYMDPDHVTIPLVTEPY YAMGTSAVHWHSDQSVRDDCSIGVYSSTVG
ESNESEPWSIGLKIAWDVTTSAVKVPLLNGSCYFLLNDMNTTHQHTVIVGDNARFSSTHR
VVVL DGN TLEYIISGRCRQAEMIAKRLNGEGSVCCQDKLEECLDVQREVEFEWIRQFWSLG
RLNAERHAGFWLREIERIEQ TWERVESAVKTLYDNLLERGDTKSYEDKQSQRSVAGTMC
CAKIILQH LERRADERQQWTKRYNSSVLRYLADNDQPIKRPSFPCRHPHSYDQTEAMDA
LKSILNKP*
```

## 16. ARSK

We identified likely orthologs of ARSK in homoscleromorph sponges, with the best hit of human ARSK to our sponge sequence database scoring 554 bits, and the best hit to bacteria scoring 371 bits.

*Our assessment:* present in Urbilateria, because present in deuterostomes and non-bilaterian animals.

*Example sequences:*

```
>P_jan|DN5128_c0_g1_i4.p1
```

```
MLLTIALQFSILCFLKERNALPIGNGTQQKPNIVFVICDSMDGRLVGNKDNVVKLPALDG
MTKNGVVFRTYSNNPICCP SRSALWSGLHHTVTRSWNNHKGLPQEYPTWAVKLQEAGYT
TEIMGKTDYTSGHHTVSNRVEAWTRAVNFTLRQEGRP TPLLVGNSSTKRVS RDWRFADKA
VEWLKETGAKLEGPFLLYVGINLPHPYSTPEEGENAGGSTFKTSPYWLDFVDKSKVTIPQ
WIPMDEMHPVDFYDSKVKNCTSNFTRDEIFNVRQYYYAMCAETDAMLGQIMDGLREIGKD
KNSYVFFSSDHGEMAMEHRQFYKMTMYEASSHVPLVVTGPGVPNHQIDDVAQLIDLFP TF
MDIAGAVHPPGLNGTSLMPFLQPHVYGNKLEERP DYVLSQYHGCNVNISSFMLRTGKYKY
VAYGNGPSQIQPHLFDLSQDPDELHDLGGVKKDIVEQMDERLRSLIDYPSVAREV DAYNR
ASFQEW RDNLGEQYEHTVANLRWWM DWQKDPEGNQAYIDQWLKQSSGNLD*
```

>O\_car|m.42407

```
MVLLSAVLP LGLFLCSAAVP SREKQGKNILFVICDSMDGRLIGKDVVHLPNLEKVAQQGI
VFENAYTNNPICCP SRSALWSGLHHTITQSWNNYKGLEKGYPTWAVKLADAGYETE IIGK
QDYTSGSHSVSNRVEAWTRAVNFTLRQEGRP TPKLVGNSSTIRVSADWHLVDKAKEWIMK
TASNITDKPFLLYVGINLPHPSGTPAEGENFGESTFPTSPYWLKYVQSNSVRI PKWLPLN
KFHPVDFYESAAKNCTSDFSQEEIFAIRQHYYAMCAETDAMFGAIVDALKESGHGNDTYI
FFASDHGEMAMEHRQFYKMSMYEASSHVPLVVS GPGVPAATQSKNVTQLIDIFPTFMDIA
GIEHPKGLNGSSLMAFLKPGFGSGYRDRPDYILS QYHGCNMNMSAFMLRKGQYKYVAYGN
GPEQVRPHLFDLAADPDELNDLSLQNLLEVVKEMDVALRSLVDYPSVSKQVDQYNRKSFKA
WRESLGDKYDDTIANLRWWM DWQKDPEGNQKKVDSWLNS*
```

## 17. Polyketide Synthase-like, also called PKS

Searching the NCBI NR protein database with the v30045764m gene model of Simakov et al. yielded deuterostome best hits, immediately followed by a hit to *Lingula anatina* (XP\_013403201.1), with no intervening bacterial sequences. This *Lingula* sequence recovers deuterostome sequences as best hits when searched against NR. (The N-terminal region of the Simakov et al. *Saccoglossus* sequence is not included in NR gene models preventing recovery of what would otherwise be one of the best deuterostome matches).

*Our assessment:* present in Urbilateria, because present in deuterostomes and protostomes.

```
>XP_013403201.1 compactin diketide synthase mokB [Lingula anatina]
XP_013403202.1 compactin diketide synthase mokB [Lingula anatina]
MPQRRKKEPCQMPTWL PENKKVAIVGIGCRFPGEINNVKDFWEVLLKGIDCTRPLPDDRF
DVNHFYHPTPKTPGKLYVRGGGYLEQDLLSFDRLFFKMPDPDEANHM DPQVRLLEVVWEA
FEDGGIPARSIRGTNCGVYMGVTASEYTTLT SARSDAISQYSNSGTNSCMVSNRISYEFD
LHG PSLSIDTACSSSLYAVHLASEAIRNGDCDMAVAGGVN VIMPEITIGFCQAGMLAPD
GRSKSFDSSADGYCRSEGAGV IILKSLNKAVEDGDRIYAVIRGGALSNDGRTPGIANPSY
SAQVNLVYRACRHAMINPQDIQYVEAHGTGTQVGDATEANALGKTIGQIKDAKTPLYIGS
VKSNI GHCEGSSGIAGVIKVALMIHNELIPPVVHFKLGNPKIKFKELNIKVPKELIIPY
VEEMPLIAGCSSFGFGGANAHVILEAPPSTNDLLLPEHESGPQIKVVLISAATTTALSSR
VDDFIELFRKIQDQEPERFYDVAATTCLRSHHHQHRLGVLGRDASEILHSLETFTKQKVA
AGFVSGEAVDSNTQTPLVVFVNGMGTQWWGMGRQLVHQEPTFAKTIQNFDTCLKRCGAKW
SMQWLLMNNQDEDLINQTEYAQPAICAVQIGLVEVLRKFGVRPDAVVGHSVGEVAAAYAS
GMLSFD SAVLI IYNRGKLLKKTSGSGKMLAVLHNTDAAQAKLNE SKHSVYIDVAAINSPS
QVVFSGSASSVDALAEMFNQEGIRAVQLKVNNAFHSYQQEPLKEKFLQKMKPLAKQEVVN
AVQVPMI STVTNNYNHYADVNDGMYWKNVRQOVKFQSAVD TLLDEGY SIFVEIGAHPAL
RGP IKDI IGARADKPVKVVVLETLKRPTASSPILEDLKNVVKTLTSLHCEGYPVQYEAMF
PSAYKVMHLPLYPWERITCSGITDFVRREYLF PVHSHPLL GEMQEDVSMHNNDP PFQFHW
KSKI SRINTPWWSHHI IQGSVILPGTAYIETALEAVNAVRQKRETITLEDVELKRFLFPK
NGEATIHTIFQENDPTTIKICSGDQSDYIEHV SCKVVALEEDEFKTQEV DIVREAF TLP
QKGLEHIQDSLELHYSSEEFYSNLAVGEIQLGSAFRAIQQASFNKSFTKCLIHTEAPDEI
```

WKEFMLYNFHPAFLDCMMQSFVAVLHLLRTNSPAPFSSSLKRFTYYSKKT PKRVAVYIKMLS  
ATDEDQNEVLAIADADSGIVCCRIDNLSFQSLEGEHSKDPMKVWSIFWVEAALPKQNEKKG  
EASPVFYLTSDNKEDLTVLQSSLLKLRVVKILDLDQDERKLNVDIVLILISQNESHISG  
PTITTTKEDVWKLKSSSSSFARDVILGILNLDGDLVLPKLWIIITVKGFQVSEGDQVSPFTAST  
FAVGLSTLHEYP SARVYMVDISSLSDISTPETELMNLCCFPFGENEFALRPKTAHSLQL  
FVRRTKFQSPLTRRHP IVSHQFRLHQNKAKQIKYVYEGDTITDVQPDNSFRISIEHF IAD  
GYFDDDPHFICTGHV IQSKGSEANLQDGTVI AVFKGCLKSETLIPQENVMPLGNFETSH  
AALLSLVNDAIASVIMVYSAKSVDREDDRVLVCTCEESRKGVLVTAQILKTLGCNVTILSYQ  
CNNDPCPDHEKLP CGQRI SNFMEDEEVLQEDALQNI GKFNAV VATGQYL INKKG YFQCLDC  
LCDFGVFVVF TQTPLKLRNFNGIRENVQFLP I SAGVKQLLKTPOYLAETLKFVDALS NKL  
CHLPTIGHALPASKIENKYLQECMGRVIHLDRP SMGMVSTF SEDTYKPNPEMTQCITGGA  
KGMGLKIVRWLIRRGSKHV VILTRSNPTTANQSVLDQLGKNADIKLYICDVSDASAVDVV  
FSEIVETQPPVENIFHCATVYLDNWMTNMSEKDWEAVMLPKAYGAVLLHQI SLKYVLP LA  
NFVMMSSLVALIGNAGQSNYATANSVLVSLVEMRRSMGLPATAVSFGVISEAGFAADNNL  
VSVWQEKGIGHI SPQTAVLGTMLELQYSHLGVTGHFDEAVYARKHRSF ITKGAVEGDV  
TLSRLQDLFSKKTQLQELAVGKYSRSHQTESSIKEKLENYLSQTLGIVDISEDTSPVEMGL  
DSL MATELRAFIDNEFNVSIPPVDLLNSSTTVAQLVSTICKQLHSGKDNASTE VVKGS DQ  
SKEAKTSFFITEKILENPKFQLFCFPSSGGGLTSFNGWQKYFSKFHTQVYVAQLPGWEGR  
RLEKPMKMNSEVIGILAREMRPLLKHGKFAFYGHSGALLSFELAHFLNEQGVLPAHLFM  
GAWIAPQIPYKETPTFRNKILDGNMDNVNFVKEAQQLTFLDGKI INNPMLRQFVPLRA  
THEMSKNY EYAPSAKLPCLKIYGGKNDAFVAREKLTAWEDIRHKDFSFGIKMFNSGHLF  
LHDIHIRALLTKDIAKTLHFV

## 18. NHLRC3 (NHL-containing protein ENSG00000188811 of Simakov et al.)

We identified likely orthologs of NHLRC3 in homoscleromorph sponges, with the best hit of human NHLRC3 to our sponge sequence database scoring 243 bits, and the best hit to bacteria scoring 151 bits.

*Our assessment:* present in Urbilateria, because present in deuterostomes and non-bilaterian animals.

*Example sequences:*

```
>C_can|DN59787_c0_g1_i1.p1  
MLSMHARRVVCTAALLCLLTQFERSASRI LLKYKLDATWPLEPSKFVASAQDFCTAVDDV  
SQEVYVGLRGPPIPLSGPVLVFGEDGTYHRSWGHNVVDMIHGMRLQRLANGTARIWVTDL  
GNGAMGHTVKMFSTDGDLLETIGTPGKAGVSLNP IQFDQVADIAIDQSDSLYIVDGDGGM  
NNRLVKLDANRNLAWSVGVRSKPSQFYIPHSVEFDPNLGMVWVADRGNRTQAFNASDG  
SFITTEWTCMRPKSPCHIRLDP SGHNFIMLDLLYANIFVIPAPKDVQSVNSCHVVRQTAMY  
PNNTKPHAFSISKTTWALYIGEVEGANVTQKYVPYSGLSRDKHSAMFTT VTFEFLCLL  
FVALLLVVRRRLRSGGKPHNQRVGLIGETIWHK*  
  
>P_jan|DN7480_c1_g1_i3.p1  
RMAERARAVLLVSVSWSFHLPRNPLSAFEYKLDATWPSATTQFVRS AQDFCTAVDDI  
RHEVYVGLRGPPIPESSGPVLVFGEDGTYRRSWGHRLVDMIHGIRLQRLVNGSLRVVWTDL  
GNGPLGHTVKMFSSDGVLLLETIGTAGEPGTSLKP IQFDQVADVAIGQNNSLYIVDGDGGM  
NNRIKLDANRKMVMSVSGSRGMKPSQFNIPHSVELDPRLDVWVADRMMNRTQAFNTTDG  
RFLAEWTCMRPLSPYHIRLDP SGHYIIMLDLASARLLVLTAPDDIKALNICRVVSETVMH  
PNNTKPHAFSVSRSTGALF IGEVEGANVTQKYIPCNTSNRHQAHPDRHEMSFVCTT VFEF  
FMLFLVFAVVL TWILQRRMRSGGRAHYHRVQMKDGSSWHK*
```

## 19. Choline monoxygenase-like (also called CMO)

Sequence searches initiated with the *Saccoglossus* protein (XP\_002738379.1, see below) retrieved strong matches to deuterostomes and the protostome *Phoronis australis* (349 bits). The best hit to bacteria scores 351 bits, but the *Phoronis* sequence searched against the entire NR database of the NCBI retrieves animal sequences as best matches.

*Our assessment:* present in Urbliateria, because present in protostomes and deuterostomes.

*Example sequences:*

```
>Sk|291236901 ref|XP_002738379.1| PREDICTED: choline monooxygenase,
chloroplastic-like [Saccoglossus kowalevskii]
MPSRRLAVLKRATSSSSNLRTGDTNDPSFDLRREVAKFDANIPVEAATTPPSTWFTRPEF
HQLEVHTVFDHAWMFAGRVDQITKPGKFFTGTIGKEPYIVLRDENNELKAFYNVCRHAM
QIVNDTEGTVKDLQCPYHGWTYALSGRLKKATRLRGIKNFSARNFGLIPMMVKAWGPLIF
IRPNKISEEKDNFFEDLES LKNRLDGIGFSSGMKFMKRITYTLNCNWKVFDNYLDGGYH
VSTAHKDLVALDASSYRTAVHEWHSIQSVSAVGSEERVCGDAIYAHIFPNLMINRYGPW
IDTNVALPLTHNTCMIVFDYFLEEDYIQKSEEDLQNILDTSTASDKVQQEDIFLCEGV
QRGLESSAYDLGRYAPGVEFADHMFHVKLAELFRRHLKIP
```

```
>Pa|g2550.t1
MNRLLSAGLLRSLTTRFSVFAQENDVQIRIRWIPFSTSMNGMNTAQRHEWIATVKGEVNR
DPSVPIESAITPPASWYINPSFLELEMETVFRNNWIAVGHVGVQVARKGQFITGTIGKEPY
IVTRDQNDLQAFFNVCRRHASVILEEECEASQFVCRYHGWTYALDGR LAKAKRLKNIR
DFKPRDYGLKKIAVQTFGPVIFLKLNEKVDVNLSSSELEELKASLDEAGSENSLRWVKRAE
FDLDCNWKVLVDNFDLGGYHIEECHPKLDSILVSNSYKTTCSGLFSIQSSMGTGERHGNN
AIYAH IYPNCMINRYGDWMDTNYIFPVGQEKCRVVDWFLSERVFSLESEEEVEEKIKSD
LENSCLVQIEDNEICARVQKGLYSRSYQYGRYAPLVEMAQHEFHRLKLYSDYGLELD
```

## 20. Ectoine synthase

Sequence searches initiated with the *Saccoglossus* protein NP\_001171779.1, L-ectoine synthase-like retrieved strong matches to anthozoan proteins with a best score of 142 bits, while the best hit in bacteria scored 124 bits. Searching the NR NCBI database with the *Exaiaptasia* hit (below) showed best matches to *Saccoglossus* and other deuterostome proteins.

*Our assessment:* present in Urbilateria, because present in deuterostomes and non-bilaterian animals.

*Example sequences:*

```
>Sk|296434217 ref|NP_001171779.1| L-ectoine synthase-like [Saccoglossus
kowalevskii]
MIVCHSEDVAVATLPNIEMK GKLLTDVEDGMGFSAYQVVAEEGETLKLRSDDSGDL DHIY
YCISGTGDVKASNGCHYKLPDCVVA FSSSVSAELIVETRIRLYVLYCDDINPSSERSV
KSLDEIVGTERDVDFKRGH SRRFLLKVDGFAITITSTAVMFTGDDPTKLEYRNHAESAY
ISGKVSYSWNEGANKIEARITPDDGT VYNNMNAHDKHMVSVHEDICIALCVFYPALRGNE
TYDGGYSCYDA
```

```
>Ep|XP_020909527.1 uncharacterized protein LOC110247442 [Exaiaptasia pallida]
```

```
MKSRI LSEL PDEQLGQTTL SGKILTFLEDNVGFFEAQFLLEK DQSHDLTPVYQDHNHIYY
CINGKASVKIDQGDNQFTLTDNTLLALSPSTKASIT ALASTRLVVVSV PGLPNQQXPYF
LSLEKISGTD RDVNF GAGQSRFLKQSDGFNISVHNTVPXLKTKVNLEYKNHF EANLLCK
GRVQYWWNNETETAVFDEKDSVTGDGIMILLDKHDNHHNEVLQEDSHSICVFY PPLKGDE
KHNFSGSGSSY
>Pd|XP_027037521.1 uncharacterized protein LOC113665976 [Pocillopora
damicornis]
MKVRVADDLP IVPLGSSEIQGKILVSLEDG VGCAMYEFYAQAGDEVTLIAFHRNHNHIYY
CVEGRCVIHDGATKQLPFTADHLLALTTDKNVHIRIQEPMRIVAVSVPHDTSVSP PPLLM
KSLDEVTDSDRNVPFEDGLSRRFLAAPDGYNISVHNTFCSSSF SKHLQYLNKELVYVIK
GQGEYVWENGQCRHDFDSEKHHGTMFLVGNNAHKMTIGARDTIAICLFY PPLMGNERLKT
GKEGGSSY
```

## 21. Ectoine Hydroxylase

Searching the NCBI NR database with *Saccoglossus* ectoine hydroxylase yields hits to 3 *Saccoglossus* sequences and 1 from *Branchiostoma*. Phylogenetic analysis of top 500 hits suggests these animal sequences form a single clade.

*Our assessment:* deuterostome specific

*Example sequences:*

```
>APU50791.1 ectoine hydroxylase-like protein 165 [Saccoglossus kowalevskii]
MYSRIQRIARFPRLVPAIKLSHRVTSQVNTGRLYCSATKDLYPTRENECKVLPRLDPVWV
NNPDGKFDGPLSSAELQEYEKNGYLILKDLFSPEEMEPVIRECKAVQKSIECNQYDIKGTG
EEAKIAMELNSTKLSRYVYAHEDIESVKKLSRNAKLVNRARQILADEVYILQSRVNYHQA
YVGQGISWHHDFDVFHADDGIPRMRALTFVAVMLDKNTPETGATMLVPGSHRNFLTSLGPT
PDNSWVLSITSKSYAGIIEQHMLTPVIESHGIEHATGDVGTVYLF DINTIHCNNVNVSPF
NRVNVFLLYNSIKNKAIKPFSAPHPRRPEFIATKDNVPIVPE
```

## 22. Histidine methyltransferase (HMT), bacterial-like, also called methyltransferase

Searches initiated with the Pfam Methyltransf\_33 HMM, scoring above the gathering threshold cutoffs ('--cut\_ga'), retrieved hits to deuterostome species and sequences from the protostome *Crassostrea gigas*. Simakov et al. also report the presence of *C. gigas* hits, and their argument for this gene being deuterostome specific rests on the oyster sequences being contamination. Using current sequence databases, similar sequences are also present in other bivalve molluscs.

*Our assessment:* present in Urbilateria, because present in protostomes and deuterostomes.

*Example sequences:*

```
>Sk|585695626 ref|XP_006822057.1| PREDICTED: uncharacterized protein
LOC102808773 [Saccoglossus kowalevskii]
MEKKIKEGLLSTPKYVPHWYLYDTQGSKLF EKNAME NPLYHIYRTEKTMLEQYSDLIISD
LGDDIVLCELGAGSLTKTTHIISALLNKNKDLTYIPIDIAGDFMLQ NATVLQEQFDSVLV
EPFVGDYNDGLTYLRSIRK GKLLIFLGNLSLSNIPLNKMENFLSRVLETMGEKDRFLIGID
LTQDKDKILAMHSDPKMGISFNENLLNRLNREFNANFKKENFQLHCNYVIRDDMCGTVKH
AQYIQKALKSTCEHVHLDLTLGLTIHFKEGELLYRHEL VNGSLKWSWNQFEDTMKRNGLY
```



LEKTWSDDANSYGLALLKRM

>XP\_034301350.1 N-methyltransferase dtpB isoform X2 [Crassostrea gigas]  
MDVKELLVKGLCSTPKYIDMSCRYDKQGSYDDQCQDIEDFYHYKAEAAIMRCNAKDAAL  
QLKTPRLRFLDLGCGSTTKSQYLINELLANKVNVEYTPIDVSKDFLQHACETLKNIYGNRL  
KVDPIAGDFMNVIPQIGKYRGRKVLWLSGLQCFPLDTQHQLLSKISESMEGDDSLMATA  
DITQDKAVIEKAYLDFDDSKPFAKLYTNGVHVNRELGGNIDLSQFILEGRHVEDKDVS  
ASYNQVWLRSLCNQSYYLEEVGKNVTFEEGEKHLHLYSGNGISHKYTIPQLENALASVKLR  
VLKKWDNGNSVLLLSTRENEL

### 23. Aromatic amino acid decarboxylase family, microbial-like; AAADC

Searches initiated with *Saccoglossus* tyrosine decarboxylase (XP\_002731852.2) revealed hits to other metazoan and bacterial proteins. A tree reconstructed from these hits focussing on the Pyridoxoc\_deC Pfam region revealed a small clade derived from *Saccoglossus* and *Branchiostoma*, nested within a bacterial clade, to the exclusion of other metazoan genes.

*Our assessment:* deuterostome specific, because shared by *Saccoglossus* and *Branchiostoma* nested within bacterial clade.

>XP\_002731852.2 PREDICTED: probable tyrosine decarboxylase 2-like  
[Saccoglossus kowalevskii]  
MSLVTEDLLQLFEENIERCGLVNSHGGHMAYVNSGGVFPFSAALGDYLAADVSPYSAVPHAS  
PGSVCLNMVINWIGRTFGFPEGFAGNLTSGGSASTILALATARDSKNVKAADFVSRVY  
MTQIAHYCVKALNTIGMREAVRRTVPTDTSTYKMNAAELKIMIEKDKNNGLIPLVYAT  
AGTTDLGSDPLNEIASIARQHSLWMMHVDACYGGFFIMSNEAKPRFRGIERCDSLAVDPH  
KSLFIPYGCVCVIVRQGSKLKYSNALNRPAFYLEDFFKDEREDEPSPCHLSFELSRHFRG  
VRVWMLKLFGLAPFRDALTEKILLARYFHEQLAERGDFQLGYPPELSVVVFRYAKAPND  
TEKFNEQLLDLSMKDGRVALASTRLRGVYHLRVCILCFRTHLKEVDFLLEMVDKNVETYL  
KSVSKKPWESQQLS

### 24. 5-methyltetrahydropteroyltriglutamate--homocysteine methyltransferase-like

Blast searches initiated with the *Saccoglossus* sequence (XP\_006818155.1) reveal likely orthologs in the protostome *Lingula anatina* and several cnidarian species. With current sequence databases, the gene no longer appears to satisfy criteria for deuterostome specificity.

*Our assessment:* present in Urbilateria, because present in deuterostomes, protostomes and non-bilaterian animals.

*Example sequences:*

>Sk|585672030 ref|XP\_006818155.1| PREDICTED: 5-  
methyltetrahydropteroyltriglutamate--homocysteine methyltransferase-like  
[Saccoglossus kowalevskii]  
MPLTTTTVIGSYPKPDYLGIPDWFGLTSTERYSAIWNRRPHDRRIKGFNFNMLTETSTRN  
GAWTAKLPTITGKIELMDGNTWAAEEWRGAQNLTDTVPKFTIPGPATLIGSTHNAFYDDK  
RTLSEDLVKVINYQIRALAKAGCRHIQLDEPVFARFPDTALNYGIEHAERCDFGIGLEVE  
KTVHICCGYPCYLDQDYQKADQEAYFKIIDKLDASGFDAISLEDAHRYNDLRLLDRIKK  
SKVVLGAVTIANSRVETVEEIRNRLEEVLRHIPASRLMVSPDCGLGFLPPPILKEKLANM

VAAAKSIQCDPEVIC

```
>La|919087672 ref|XP_013380915.1| PREDICTED: 5-  
methyltetrahydropteroyltriglutamate--homocysteine methyltransferase-like  
isoform X1 [Lingula anatina]  
MAGTQGILTTVIGSYPKPDYDKIPDWFRRSSHTGYSSDQYDEYVRRKVRAEESVVEKALAE  
CMEEQTALGIDVITDGEIRRENYIYPFCRHLKNFSFEELTFKTYRNGACSGQVPTVIGPL  
EPTSADPWCATEWQESQAMTKTPVKYTMPGPMTIIGSTANKFYQHDKELSEVLVKLVNRE  
LLALAAAGCKYIQIDEPVMVRNPEIAMDYGIDHLARCFEGVGPEIEKIVHLCCGYPNCLD  
QTDYLKADPSVYMDLAEKLDNAQFDVAVSIEDAHCHNNLALLEKFKKTKVIFGVVAIAKSQ  
VETVEEIKSRVMEALKHIPKERIILAPDCGLAFLPRNILRQKLSNMVTAAKSIV
```

## 25. Major Facilitator Transporter algal-like, MFS algal-like

When searching with the major facilitator transporter algal-like from *Saccoglossus kowalevskii* (NCBI accession: ALR88600.1 see below), we were not able to detect non-hemichordate hits within the animals, and indeed only hits to hemichordate sequences are recorded by Simakov et al. As such, on their terms, this sequence does not qualify for the general classification of a ‘deuterostome specific’, but rather is hemichordate specific, and is uninformative for deuterostome phylogeny.

*Our assessment:* hemichordate specific, not deuterostome specific.

*Example sequence:*

```
>ALR88600.1 major facilitator transporter algal-like [Saccoglossus  
kowalevskii]  
MRSNKLSREDIPGDEIDNDQSDEKVPLLSDNVTETTKEKITRVYGALKPFVVISSSYLLY  
TITDGAVRMIVLLHAFSLNFTALETAIMFSLYELAGVFTNLVAGVAGARWGIKSTLITGL  
CLQFVVGIGMLFGWQENWTKSIGIVYVTVAQMFVCGISKDLVKLGGKTVTKLVTPEDKQTRL  
FKIVSLLTGWKNLTKGVGYFLGSALLMINYYLSLGVMCVLIICALPWAICGLSKDLGRTR  
RENIKLSTIFKKNFNVNILSLARFFLFGSRDLWFEVPLPFFLRSDDGIGWERA AVGAYLA  
GWIIYGVQVQSWSPQLLLKPLRQSPANKWVCALWGFILIVCPVFLGCFLQFSHAIQEHVV  
EIMTAAITVGLIMFAVVFVNSAVHSYLIVKYSEGDKVAMNVGFYYMANAMGRLTGTLIS  
GVLYDYVGAATSTAQGFASCFWVSVGFVVAACVALFLNDNSGGLQCGPCLNCLNSRSGT  
GEGRYEVIDNKDDNEPTQSSAVTHTA
```

## 26. Multicopper oxidase (MCO); also called Bilirubin oxidase-like

We find similar sequences to *Saccoglossus* multicopper oxidase in tunicates, amphioxus, but not protostomes. We also find proteins with the same domain structure in *Monosiga brevicollis* and other choanoflagellates. As choanoflagellates are the sister group of animals, this raises the possibility of presence in non-bilaterian animals, but we are unable to produce evidence that the choanoflagellate sequences form a monophyletic clade with the animal sequences.

*Our assessment:* of uncertain status.

Example sequences:

```
>ALR88601.1 multicopper oxidase-like [Saccoglossus kowalevskii]
```

MKTWHIFLALFVNALAIHDFQDLRQPTEIISQNGALNFTFTVDVFRYIGQVNYTTTRAYYY  
HGVGSI PGPTWRVKAGDTITFTLKNALPPGQSTEYEHNTMHSPDTTNMHTHGLHVNPYED  
DVFI EVHP EEQHVYTYVLPDNHAPGMHWYHAHHHGATAFQVIGGLAGAIIVDPVDDSIIP  
PELSNMDEIVMILQHMKFSDPGNGCPNSENFNVAFRPYSYLEISDEIGDTLDVNP SLAN  
TSLADFYV VNGQYQPRIQMRPGEKKVFRLLHAAGTHTLEIEIPGCNIYRISR DGVYRSEP  
TDAVDVIVLIQASRADIIVDCPRPGTFILKSTIDPSRDNI VSSNVLRYFQDPILTIEVSG  
DELIMPLPSQLPPLPSYLSDLQNVSRQDIAGQYRVDFGQLRGPETCNFGINGMLFRGPDV  
YDHIMTLDTIEEWMIKDTGPESHFFHLHVNHFQVISTTYQDDPNQIVFEIGEWRTLAAR  
DVTTIRFRDTDFPGVLVLHCHYLRHEDLGMMQVTYIESSPETDTGDHGTGSIGQEAEPNR  
GGIKHSESIELHESDINSSGQFKSSTYVFFTTVMIVVLSII

>XP\_001746360.1 uncharacterized protein MONBRDRAFT\_26023 [Monosiga brevicollis  
MX1] >EDQ88747.1 predicted protein [Monosiga brevicollis MX1]  
MRQTSLLGLVALLLCGLATGLHSAEDTSTDAATADRARAMQMLPAKRFSASHPAALPEV  
LNSHLRRHAARYGHAVRACEAWSTSDLNVAELVQQLADDGARSLLALYAQRGEPRRL  
RLSSLAAYSAAWQEEELIDRLGAASREAQLLRAGKCYEASMLYIHGASSKVKQGLSTAF  
NVPLLEPGPLATLVTDHISAMRLTPTADPATSSPIDSNVLTNVQDQVVCVRCHVTPNATF  
SPRQYDVVVNGSHPLLRSPQVLRSAQGVLNATLDVGVARLSGGPLEFNVRAYNGGTPGPT  
LWVQPGDSIHVTLNNHLEAPDACQAGPSGAGPDSNFYRCPNTTNIHLHGLWVTPHDVFRG  
IGPGGRLTQTYSLTTDHAPGTNWNYPHFHGSVSLQLAMGMAGAVVVDDPPNSLPPALEAL  
RSRDHVMLLQSI EYFNQYQDDINCPYEDGLSHCHNMDGAGSLATLRAFSSDALPLNMERR  
DPGYGYPIDGVYFLLNGQFQPVVMTQPG EYQRWRLVNGAHQASLSLSVPGCTVWLLSMDG  
VYLS SPRLKNTSYPLVLAPGARGDVAVSCAMPGLFELRSNENPDVWNLGAQEGFNTGVIA  
LVNVSGPNLNMSAPTRLP SRPAYLQDLRPA SVPA GNTRNVSWDLIRLINNTAGLTDVPIY  
GVSQQAFNASNP SRDCINARSGVQEWQLVNP IWICNASVTTCLSTMDRNAASGALLRDYQ  
EPVTL SHGFHLHTFKFQVADSNGGVSADYELGDWRDVTTPLAGWVRI RWQPQTFEGVI  
PWHCHMSVHSDRGMIGASTVASQCPAAPNAVSRARAAAQARARPAMAHLASGNWEPRLGN  
FTWNVSTHSPAAQALFNEATMMAFGFARDAASATYLRALQADPTCAMCAWGVAYANGPFL  
NHPECSNATCGLGF EYAE LAATLANHSVTA AEAMLIRGMQQRYSQDPKANQTAHF MAYA  
QALNATALVHSDPTLAAFAAEAYMLLHCQDDGYHFNFNGT PVPDLAWVIDLLGSYLFYP  
NTNDVLPGRHPFVSHLYIHAVEP SGAGMGPNAAGRAFGVAQRLSSVLPNVTSLWQHLQH  
MPAHIFLRTGYYGLGVAANMIAHASDATWLNHSLVPYGP GHNLIFLIYCACMDGQSSTAI  
HYGEVVRQVYQAAPDRPDGPGADLAYNWPATTFVRF GSWDAI LAADWFTMPRPFYQAL  
AHYAI GLAQ AHTGNVTGARASLQNLQRVQATLTGRAATYCRVANWTLGAAVARATGPAGV  
PTALSLLSTAVAEQMGWPYDEPPDFHQPIQQCLGQLQLELGNYSAA YDTFQANLAHY PNN  
GWALWGLLQAVQHLPYDPSRPSAASITTRL SAAWERADVPLTSACALIHFP

## Deuterostome novelties without eukaryotic or prokaryotic homologs

### 27. FAM198A

We only detected deuterostome hits for searches initiated with human FAM198A.

*Our assessment:* deuterostome specific.

### 28. C9orf9 (Rsb66)

We only detected deuterostome hits for searches initiated with human C9orf9.

*Our assessment:* deuterostome specific.

## 29. MREG

We only detected deuterostome hits for searches initiated with human MREG.

*Our assessment:* deuterostome specific.

## 30. SMIM19

We only detected deuterostome hits for searches initiated with human SMIM19.

*Our assessment:* deuterostome specific.

## 31. EFCC1

Database searches initiated with human EFCC1 detected a likely ortholog in the protostome *Priapulus caudatus*, with no significant hits to non-animals.

*Our assessment:* present in Urbilateria, because present in protostomes and deuterostomes.

```
>XP_014670810.1 PREDICTED: EF-hand and coiled-coil domain-containing protein  
1-like [Priapulus caudatus]  
MEARSVSRTEWVVSALAHHYGFDQGAPNEIVVLSLGVLDQYIQEIFNNLDCAGAGVVSAD  
QFRALCDVLAVGSPSPDDLPTSLDFKQFHARLCEHVLATFGVRDFRPSSARVADDDEEY  
VTTSIKLNQATSLRGGGGGERPLAATACITCSMCVRELVNSLLLKCKMSFAGAMRRGGG  
GAALTAEQGDCAAKIELIWRAIVDSYETLQQRVVAQEEVEGLRELVEDLRAALQSGDAR  
CLAFQVELRRTRQLQRQRQDPCRRVCVCDGGAPATIHRSVKTIEIRNGRVHSPDDDDHH  
QVAPPLRGDDQQAAPPTLAERYRHYSPRCMERLVREMARVRGNRDVQLQEALYVTEDLQY  
EARKRRRAIERLQREADELVALQSRTRDGLREARVYVGDGLERVLELESEARELPLLREK  
VRQLTKKATSPQERNQCSSSNGRSSPMGQCCSPKCPSPDILDHRAVEGQSGSEDDISTGR  
DDVTIPDDVITPADITKIQAEVTS�KRQLADCHFKAEEVNASMREELANKQFECDEVLVE  
LQQSENERARLTIIEHGLRDALHLLNGLKSNLVSRRTLGKMVMDALDRSETMTSADEAVQ  
VFVTSLQTI AAGSALLHSSASEDSSPNTTPKRRIPVIREDI ISS
```

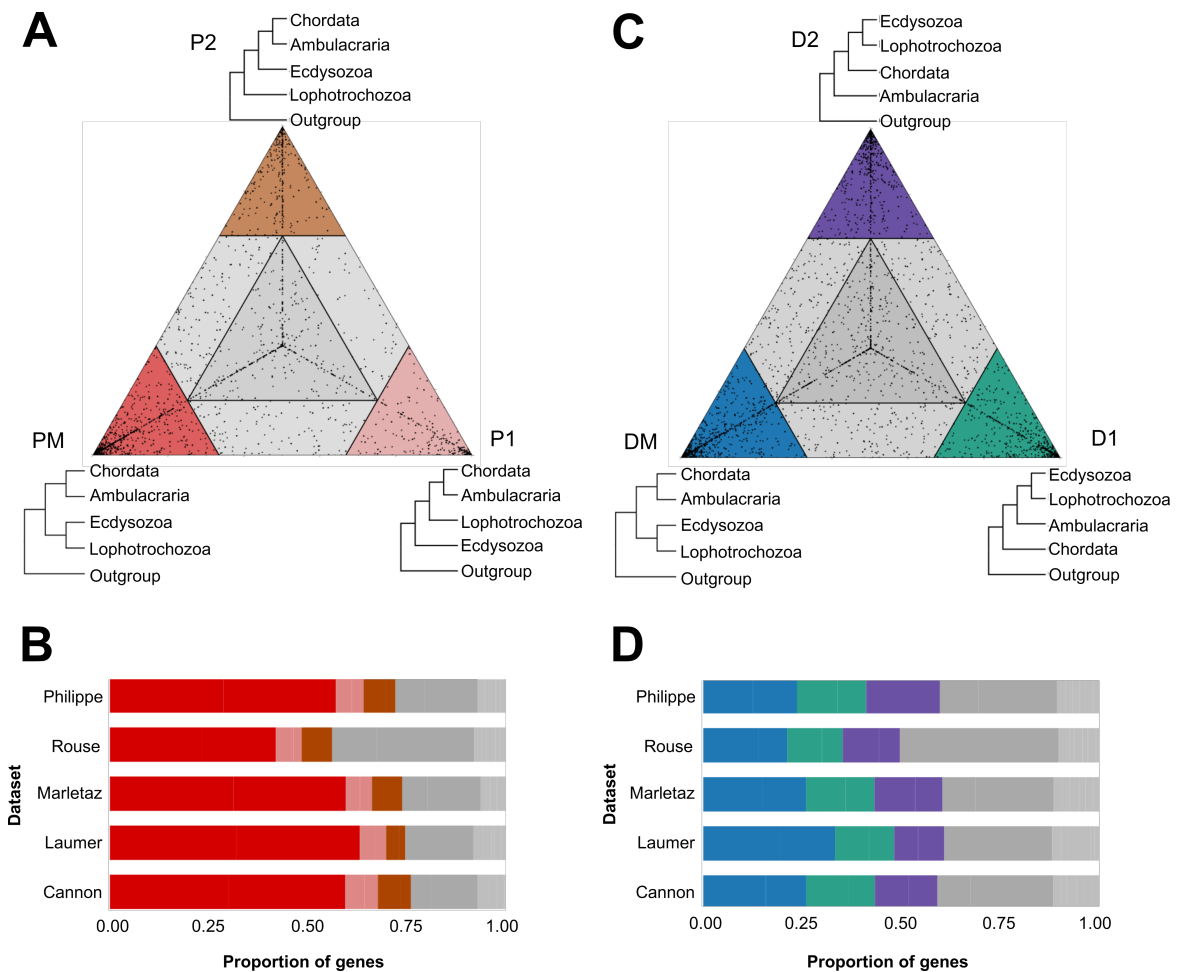

**Fig.S1 Support of individual genes in each dataset for the monophyletic Protostomia and Deuterostomia and alternatives when *Xenoturbella* is excluded.** Triangular plots showing relative support for the three alternative topologies shown at the corners of the triangles. Genes in coloured corners show a high preference for the corresponding topology. The numbers of genes found in the different coloured sectors of the large triangle are shown below. A. Triangle plot comparing support for monophyletic Protostomia (PM) versus two alternative topologies with paraphyletic Protostomia (P1, P2). B. Bar plot showing that across five datasets the majority of genes strongly prefer the monophyletic Protostomia topology. C. Triangle plot comparing support for monophyletic Deuterostomia (DM) versus two alternative topologies with paraphyletic Deuterostomia (D1, D2). D. Bar plot showing that across five datasets a minority of genes strongly prefer the monophyletic Deuterostomia topology over paraphyletic topologies or the grey areas.

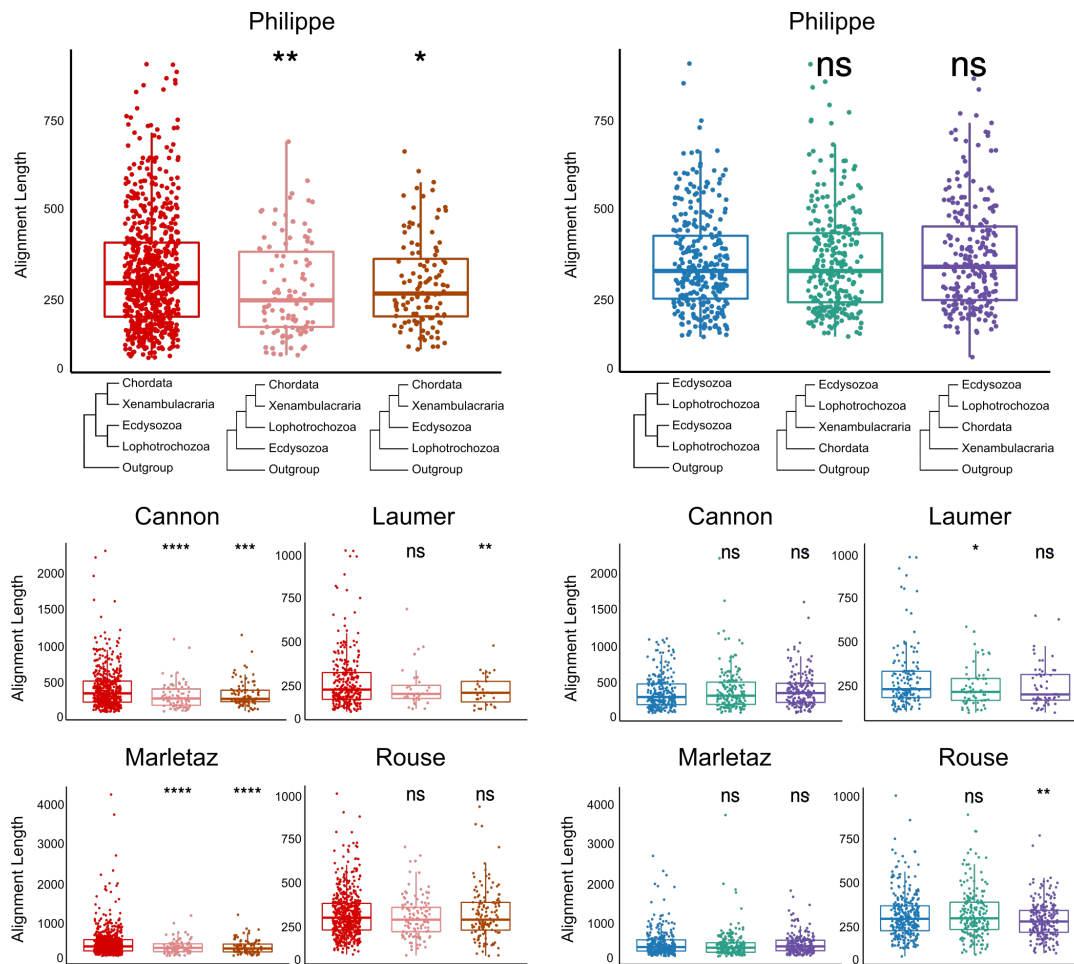

**Fig.S2 Longer genes tend to support monophyletic Protostomia but not monophyletic Deuterostomia.** Box plots showing the distribution of alignment lengths for genes strongly supporting the three alternative topologies shown (sets of genes selected using the data shown in Fig. 2). Longer alignments are expected to contain more phylogenetic signal. Asterisks indicate significance at  $p < 0.05$  using a Welch t-test for equal means. Left: Data from all five named datasets comparing the lengths of gene alignments supporting monophyletic Protostomia versus those supporting two alternative topologies with paraphyletic Protostomia. For most datasets the genes supporting monophyletic Protostomia are significantly longer than the genes supporting the alternative topologies. Right: Data from all five datasets comparing lengths of gene alignments supporting monophyletic Deuterostomia versus two alternative topologies with paraphyletic Deuterostomia. For most datasets the genes supporting monophyletic Deuterostomia are not significantly longer than the genes supporting the alternative topologies.

| <b>Dataset</b> | <b>Topology</b> | <b>Proportions</b> | <b>Alignment Length</b> | <b>Monophyly Score</b> |
|----------------|-----------------|--------------------|-------------------------|------------------------|
| Cannon         | PM              | 61.75%             | 426.2                   | 0.634                  |
| Cannon         | P2              | 11.01%             | 346.8                   | 0.594                  |
| Cannon         | P1              | 9.08%              | 324                     | 0.584                  |
| Cannon         | Px              | 9.99%              | 245.5                   | 0.577                  |
| Laumer         | PM              | 65.88%             | 269.6                   | 0.628                  |
| Laumer         | P2              | 7.35%              | 214                     | 0.589                  |
| Laumer         | P1              | 7.58%              | 232.4                   | 0.55                   |
| Laumer         | Px              | 12.56%             | 195                     | 0.568                  |
| Marletaz       | PM              | 61.50%             | 408.7                   | 0.564                  |
| Marletaz       | P2              | 9.20%              | 309.3                   | 0.554                  |
| Marletaz       | P1              | 7.92%              | 310.8                   | 0.559                  |
| Marletaz       | Px              | 14.22%             | 215.3                   | 0.536                  |
| Philippe       | PM              | 58.65%             | 323.4                   | 0.626                  |
| Philippe       | P2              | 9.55%              | 293.3                   | 0.59                   |
| Philippe       | P1              | 8.70%              | 277.7                   | 0.582                  |
| Philippe       | Px              | 14.32%             | 224.9                   | 0.564                  |
| Rouse          | PM              | 46.94%             | 340.3                   | 0.494                  |
| Rouse          | P2              | 11.46%             | 339.8                   | 0.474                  |
| Rouse          | P1              | 10.02%             | 323.8                   | 0.466                  |
| Rouse          | Px              | 23.01%             | 321.1                   | 0.478                  |
| <b>Average</b> | <b>PM</b>       | <b>58.94%</b>      | <b>353.64</b>           | <b>0.5892</b>          |
| <b>Average</b> | <b>P2</b>       | <b>9.71%</b>       | <b>300.64</b>           | <b>0.5602</b>          |
| <b>Average</b> | <b>P1</b>       | <b>8.66%</b>       | <b>293.74</b>           | <b>0.5482</b>          |
| <b>Average</b> | <b>Px</b>       | <b>14.82%</b>      | <b>240.36</b>           | <b>0.5446</b>          |

**Table S1. Proportions, average alignment length and monophyly scores of genes supporting the monophyly of Protostomia and its alternatives.** PM indicates the cluster of genes that support the monophyly of Protostomia. P1 indicates the genes that support the protostome paraphyly where Lophotrochozoa are sister to Deuterostomia, and P2 indicates the genes that support the protostome paraphyly where Ecdysozoa are sister to Deuterostomia. Px indicates the cluster of genes that show no preference to any of the three topologies.

| <b>Dataset</b> | <b>Topology</b> | <b>Proportions</b> | <b>Alignment Length</b> | <b>Monophyly Score</b> |
|----------------|-----------------|--------------------|-------------------------|------------------------|
| Cannon         | DM              | 28.60%             | 389                     | 0.621                  |
| Cannon         | D2              | 22.02%             | 424.7                   | 0.638                  |
| Cannon         | D1              | 20.09%             | 419.5                   | 0.622                  |
| Cannon         | Dx              | 17.25%             | 264.3                   | 0.58                   |
| Laumer         | DM              | 35.07%             | 286.2                   | 0.603                  |
| Laumer         | D2              | 14.93%             | 265.9                   | 0.6                    |
| Laumer         | D1              | 15.17%             | 244.7                   | 0.599                  |
| Laumer         | Dx              | 22.99%             | 189.8                   | 0.617                  |
| Marletaz       | DM              | 27.34%             | 412.3                   | 0.562                  |
| Marletaz       | D2              | 18.99%             | 407.3                   | 0.58                   |
| Marletaz       | D1              | 20.27%             | 362.6                   | 0.558                  |
| Marletaz       | Dx              | 20.70%             | 240.7                   | 0.533                  |
| Philippe       | DM              | 25.58%             | 309.1                   | 0.617                  |
| Philippe       | D2              | 20.55%             | 324.8                   | 0.615                  |
| Philippe       | D1              | 23.02%             | 314.3                   | 0.612                  |
| Philippe       | Dx              | 21.06%             | 237                     | 0.577                  |
| Rouse          | DM              | 26.66%             | 350.4                   | 0.48                   |
| Rouse          | D2              | 19.35%             | 323.6                   | 0.496                  |
| Rouse          | D1              | 17.32%             | 362.7                   | 0.496                  |
| Rouse          | Dx              | 24.28%             | 297.1                   | 0.484                  |
| <b>Average</b> | <b>DM</b>       | <b>28.65%</b>      | <b>349.40</b>           | <b>0.5766</b>          |
| <b>Average</b> | <b>D2</b>       | <b>19.17%</b>      | <b>349.26</b>           | <b>0.5858</b>          |
| <b>Average</b> | <b>D1</b>       | <b>19.17%</b>      | <b>340.76</b>           | <b>0.5774</b>          |
| <b>Average</b> | <b>Dx</b>       | <b>21.26%</b>      | <b>245.78</b>           | <b>0.5582</b>          |

**Table S2. Proportions, average alignment length and monophyly scores of genes supporting the monophyly of Deuterostomia and its alternatives.** DM indicates the cluster of genes that support the monophyly of Deuterostomia. D1 indicates the genes that support the deuterostome paraphyly where the Xenambulacraria are sister to Protostomia. D2 indicates the genes that support the deuterostome paraphyly where Chordata are sister to Deuterostomia. Dx indicates the cluster of genes that show no preference to any of the three topologies.



| <b>Dataset</b> | <b>Genes Supporting topology 1</b> | <b>Genes Supporting topology 2</b> | <b>P-value</b> |
|----------------|------------------------------------|------------------------------------|----------------|
| Laumer         | <b>DM</b> (148)                    | <b>D1</b> (64)                     | 0.04945*       |
| Philippe       | <b>DM</b> (300)                    | <b>D1</b> (270)                    | 0.6855         |
| Cannon         | <b>DM</b> (252)                    | <b>D1</b> (177)                    | 0.241          |
| Marletaz       | <b>DM</b> (321)                    | <b>D1</b> (238)                    | 0.08241        |
| Rouse          | <b>DM</b> (314)                    | <b>D1</b> (204)                    | 0.3317         |
| Laumer         | <b>DM</b> (148)                    | <b>D2</b> (63)                     | 0.4596         |
| Philippe       | <b>DM</b> (300)                    | <b>D2</b> (241)                    | 0.2372         |
| Cannon         | <b>DM</b> (252)                    | <b>D2</b> (194)                    | 0.1436         |
| Marletaz       | <b>DM</b> (321)                    | <b>D2</b> (223)                    | 0.8731         |
| Rouse          | <b>DM</b> (314)                    | <b>D2</b> (228)                    | 0.008017*      |
| Laumer         | <b>PM</b> (278)                    | <b>P1</b> (32)                     | 0.1285         |
| Philippe       | <b>PM</b> (688)                    | <b>P1</b> (102)                    | 0.001891*      |
| Cannon         | <b>PM</b> (544)                    | <b>P1</b> (80)                     | 0.00001572*    |
| Marletaz       | <b>PM</b> (722)                    | <b>P1</b> (93)                     | 0.00001684*    |
| Rouse          | <b>PM</b> (553)                    | <b>P1</b> (118)                    | 0.1573         |
| Laumer         | <b>PM</b> (278)                    | <b>P2</b> (31)                     | 0.004006*      |
| Philippe       | <b>PM</b> (688)                    | <b>P2</b> (112)                    | 0.02411*       |
| Cannon         | <b>PM</b> (544)                    | <b>P2</b> (97)                     | 0.0002559*     |
| Marletaz       | <b>PM</b> (722)                    | <b>P2</b> (108)                    | 0.000005674*   |
| Rouse          | <b>PM</b> (553)                    | <b>P2</b> (135)                    | 0.9662         |

\*Statistically significantly different

**Table S3. Results of t-test comparing alignment length of genes supporting the monophyly of either Protostomia or Deuterostomia and the two alternative topologies.**

PM stands for Protostomia monophyly, DM for Deuterostomia monophyly, P1 and P2 the two paraphyletic alternative topologies for Protostomia, and D1 and D2 the two paraphyletic alternative topologies for Deuterostomia.

| Dataset               | Model      | True Tree: D1 |     |    | True Tree: D2 |     |    | True Tree: DM |       |
|-----------------------|------------|---------------|-----|----|---------------|-----|----|---------------|-------|
|                       |            | D1            | DM  | D2 | D2            | DM  | D1 | DM            | other |
| 36-taxa-50K           | LG+F+G     | 60            | 40  | -  | 88            | 12  | -  | 100           | -     |
| 36-taxa-50K           | C60+LG+F+G | 100           | -   | -  | 100           | -   | -  | 100           | -     |
| 35-taxa-50K-noXeno    | LG+F+G     | 92            | 8   | -  | 90            | 10  | -  | 100           | -     |
| 35-taxa-50K-noXeno    | C60+LG+F+G | 100           | -   | -  | 100           | -   | -  | 100           | -     |
| 23-taxa-50K-no-longs  | LG+F+G     | 100           | -   | -  | 100           | -   | -  | 100           | -     |
| 23-taxa-50K-no-shorts | LG+F+G     | -             | 100 | -  | -             | 100 | -  | 100           | -     |
| 36-taxa-10K           | LG+F+G     | 70            | 30  | -  | 96            | 4   | -  | 100           | -     |
| 36-taxa-10K           | C60+LG+F+G | 86            | 14  | -  | 100           | -   | -  | 100           | -     |
| 23-taxa-10K-no-longs  | LG+F+G     | 93            | 5   | 2  | 100           | -   | -  | 100           | -     |
| 23-taxa-10K-no-shorts | LG+F+G     | -             | 100 | -  | -             | 100 | -  | 100           | -     |

**Table S4. Percentage of simulation replicates supporting alternative topologies for the Deuterostomia clades under three different true tree hypotheses for different datasets and models.** The datasets are based on a reduced version of the Laumer dataset consisting of 36 taxa covering all major branches of the phylogeny. In the first six rows, the results are based on a subselection of 50,000 sites and on the final four rows the results are based on a subselection of 10,000 sites. For both the 10,000 and 50,000 site samples we repeated the experiments after removing the 13 longest protostome and outgroup branches (“no-longs”) and the 13 shortest protostome and outgroup branches (“no-shorts”). For the 50,000 site dataset we repeated the analyses after removing *Xenoturbella* (“noXeno”). The two models used for the inference of the trees are the LG+F+G and the C60+LG+F+G. The three tree hypotheses assumed for the simulations differ only with respect to the relationships of the deuterostome clades (DM: monophyletic deuterostomes, D1: Xenambulacraria are sister to Protostomia, D2: Chordata are sister to Deuterostomia).

## REFERENCES AND NOTES

1. P. Kapli, Z. Yang, M. J. Telford, Phylogenetic tree building in the genomic age. *Nat. Rev. Genet.* **21**, 428–444 (2020).
2. J. T. Cannon, B. C. Vellutini, J. Smith, F. Ronquist, U. Jondelius, A. Hejnol, Xenacoelomorpha is the sister group to Nephrozoa. *Nature* **530**, 89–93 (2016).
3. C. E. Laumer, R. Fernández, S. Lemer, D. Combosch, K. M. Kocot, A. Riesgo, S. C. S. Andrade, W. Sterrer, M. V. Sørensen, G. Giribet, Revisiting metazoan phylogeny with genomic sampling of all phyla. *Proc. R. Soc. B Biol. Sci.* **286**, 20190831 (2019).
4. H. Philippe, A. J. Poustka, M. Chiodin, K. J. Hoff, C. Dessimoz, B. Tomiczek, P. H. Schiffer, S. Müller, D. Domman, M. Horn, H. Kuhl, B. Timmermann, N. Satoh, T. Hikosaka-Katayama, H. Nakano, M. L. Rowe, M. R. Elphick, M. Thomas-Chollier, T. Hankeln, F. Mertes, A. Wallberg, J. P. Rast, R. R. Copley, P. Martinez, M. J. Telford, Mitigating anticipated effects of systematic errors supports sister-group relationship between Xenacoelomorpha and Ambulacraria. *Curr. Biol.* **29**, 1818–1826.e6 (2019).
5. F. Marlétaz, K. T. C. A. Peijnenburg, T. Goto, N. Satoh, D. S. Rokhsar, A new spiralian phylogeny places the enigmatic arrow worms among Gnathiferans. *Curr. Biol.* **29**, 312–318.e3 (2019).
6. G. W. Rouse, N. G. Wilson, J. I. Carvajal, R. C. Vrijenhoek, New deep-sea species of *Xenoturbella* and the position of Xenacoelomorpha. *Nature* **530**, 94–97 (2016).
7. J. Felsenstein, Cases in which parsimony or compatibility methods will be positively misleading. *Syst. Biol.* **27**, 401–410 (1978).
8. N. Lartillot, H. Philippe, A Bayesian mixture model for across-site heterogeneities in the amino-acid replacement process. *Mol. Biol. Evol.* **21**, 1095–1109 (2004).
9. N. Lartillot, H. Brinkmann, H. Philippe, Suppression of long-branch attraction artefacts in the animal phylogeny using a site-heterogeneous model. *BMC Evol. Biol.* **7**, S4 (2007).

10. N. Lartillot, N. Rodrigue, D. Stubbs, J. Richer, Phylobayes mpi: Phylogenetic reconstruction with infinite mixtures of profiles in a parallel environment. *Syst. Biol.* **62**, 611–615 (2013).
11. A. M. A. Aguinaldo, J. M. Turbeville, L. S. Linford, M. C. Rivera, J. R. Garey, R. A. Raff, J. A. Lake, Evidence for a clade of nematodes, arthropods and other moulting animals. *Nature* **387**, 489–493 (1997).
12. J. Bergsten, A review of long-branch attraction. *Cladistics* **21**, 163–193 (2005).
13. J. E. Tarver, R. S. Taylor, M. N. Puttick, G. T. Lloyd, W. Pett, B. Fromm, B. E. Schirrmeyer, D. Pisani, K. J. Peterson, P. C. J. Donoghue, Well-annotated microRNAomes do not evidence pervasive miRNA loss. *Genome Biol. Evol.* **10**, 1457–1470 (2018).
14. D. Papillon, Y. Perez, X. Caubit, Y. Le Parco, Identification of chaetognaths as protostomes is supported by the analysis of their mitochondrial genome. *Mol. Biol. Evol.* **21**, 2122–2129 (2004).
15. P. Natsidis, P. H. Schiffer, I. Salvador-Martínez, M. J. Telford, Computational discovery of hidden breaks in 28S ribosomal RNAs across eukaryotes and consequences for RNA integrity numbers. *Sci. Rep.* **9**, 19477 (2019).
16. O. Simakov, T. Kawashima, F. Marlétaz, J. Jenkins, R. Koyanagi, T. Mitros, K. Hisata, J. Bredeson, E. Shoguchi, F. Gyoja, J.-X. Yue, Y.-C. Chen, R. M. Freeman, A. Sasaki, T. Hikosaka-Katayama, A. Sato, M. Fujie, K. W. Baughman, J. Levine, P. Gonzalez, C. Cameron, J. H. Fritzenwanker, A. M. Pani, H. Goto, M. Kanda, N. Arakaki, S. Yamasaki, J. Qu, A. Cree, Y. Ding, H. H. Dinh, S. Dugan, M. Holder, S. N. Jhangiani, C. L. Kovar, S. L. Lee, L. R. Lewis, D. Morton, L. V. Nazareth, G. Okwuonu, J. Santibanez, R. Chen, S. Richards, D. M. Muzny, A. Gillis, L. Peshkin, M. Wu, T. Humphreys, Y.-H Su, N. H. Putnam, J. Schmutz, A. Fujiyama, J.-R. Yu, K. Tagawa, K. C. Worley, R. A. Gibbs, M. W. Kirschner, C. J. Lowe, N. Satoh, D. S. Rokhsar, J. Gerhart, Hemichordate genomes and deuterostome origins. *Nature* **527**, 459–465 (2015).
17. W. Wang, J. Zhong, B. Su, Y. Zhou, Y. Q. Wang, Comparison of Pax1/9 locus reveals 500-Myr-old syntenic block and evolutionary conserved noncoding regions. *Mol. Biol. Evol.* **24**, 784–791 (2007).

18. P. Kapli, M. J. Telford, Topology-dependent asymmetry in systematic errors affects phylogenetic placement of Ctenophora and Xenacoelomorpha. *Sci. Adv.* **6**, eabc5162 (2020).
19. M. J. Telford, G. E. Budd, H. Philippe, Phylogenomic insights into animal evolution. *Curr. Biol.* **25**, R876–R887 (2015).
20. K. Grobben, Die systematische einteilung des tierreichs. *Verhandlungen der Zool. Gesellschaft Österreich.* **58**, 491–511 (1908).
21. F. Marlétaz, E. Martin, Y. Perez, D. Papillon, X. Caubit, C. J. Lowe, B. Freeman, L. Fasano, C. Dossat, P. Wincker, J. Weissenbach, Y. Le Parco, Chaetognath phylogenomics: A protostome with deuterostome-like development. *Curr. Biol.* **16**, R577–R578 (2006).
22. P. Willmer, *Invertebrate Relationships: Patterns in Animal Evolution* (Cambridge University Press, 1990).
23. J. M. Martín-Durán, R. Janssen, S. Wennberg, G. E. Budd, A. Hejnol, Deuterostomic development in the protostome *Priapulid caudatus*. *Curr. Biol.* **22**, 2161–2166 (2012).
24. S. A. Wennberg, R. Janssen, G. E. Budd, Early embryonic development of the priapulid worm *Priapulid caudatus*. *Evol. Dev.* **10**, 326–338 (2008).
25. E. E. Ruppert, Key characters uniting hemichordates and chordates: Homologies or homoplasies? *Can. J. Zool.* **83**, 8–23 (2005).
26. D. G. Shu, S. C. Morris, J. Han, L. Chen, X. L. Zhang, Z. F. Zhang, H. Q. Liu, Y. Li, J. N. Liu, Primitive deuterostomes from the Chengjiang Lagerstätte (Lower Cambrian, China). *Nature* **414**, 419–424 (2001).
27. Q. Ou, S. C. Morris, J. Han, Z. Zhang, J. Liu, A. Chen, X. Zhang, D. Shu, Evidence for gill slits and a pharynx in Cambrian vetulicolians: Implications for the early evolution of deuterostomes. *BMC Biol.* **10**, 81 (2012).

28. J. Han, S. C. Morris, Q. Ou, D. Shu, H. Huang, Meiofaunal deuterostomes from the basal Cambrian of Shaanxi (China). *Nature* **542**, 228–231 (2017).
29. S. C. Morris, S. L. Halgedahl, P. Selden, R. D. Jarrard, Rare primitive deuterostomes from the Cambrian (Series 3) of Utah. *J. Paleo.* **89**, 631–636 (2015).
30. K. J. Peterson, D. J. Eernisse, The phylogeny, evolutionary developmental biology, and paleobiology of the Deuterostomia: 25 years of new techniques, new discoveries, and new ideas. *Org. Divers. Evol.* **16**, 401–418 (2016).
31. A. Hejnol, M. Q. Martindale, Acoel development indicates the independent evolution of the bilaterian mouth and anus. *Nature* **456**, 382–386 (2008).
32. J. A. Cunningham, A. G. Liu, S. Bengtson, P. C. J. Donoghue, The origin of animals: Can molecular clocks and the fossil record be reconciled? *Bioessays* **39**, 1–12 (2017).
33. T. Flouri, A. Stamatakis, P. Kapli, newick-tools: A novel software for simulating and processing phylogenetic trees (2018); <https://github.com/xflouris/newick-tools>.
34. L. T. Nguyen, H. A. Schmidt, A. Von Haeseler, B. Q. Minh, IQ-TREE: A fast and effective stochastic algorithm for estimating maximum-likelihood phylogenies. *Mol. Biol. Evol.* **32**, 268–274 (2015).
35. K. Strimmer, A. Von Haeseler, Likelihood-mapping: A simple method to visualize phylogenetic content of a sequence alignment. *Proc. Natl. Acad. Sci. U.S.A.* **94**, 6815–6819 (1997).
36. N. Hamilton, M. Ferry, ggtern: Ternary diagrams using ggplot2. *J. Stat. Software, Code Snippets.* **87**, 1–17 (2018).
37. C. Camacho, G. Coulouris, V. Avagyan, N. Ma, J. Papadopoulos, K. Bealer, T. L. Madden, BLAST+: Architecture and applications. *BMC Bioinformatics.* **10**, 421 (2009).
38. L. S. Quang, O. Gascuel, N. Lartillot, Empirical profile mixture models for phylogenetic reconstruction. *Bioinformatics* **24**, 2317–2323 (2008).

39. D. A. Ludeman, N. Farrar, A. Riesgo, J. Paps, S. P. Leys, Evolutionary origins of sensation in metazoans: Functional evidence for a new sensory organ in sponges. *BMC Evol. Biol.* **14**, 3 (2014).
40. H. C. Wang, B. Q. Minh, E. Susko, A. J. Roger, Modeling site heterogeneity with posterior mean site frequency profiles accelerates accurate phylogenomic estimation. *Syst. Biol.* **67**, 216–235 (2018).
41. P. Simion, H. Philippe, D. Baurain, M. Jager, D. J. Richter, A. Di Franco, B. Roure, N. Satoh, É. Quéinnec, A. Ereskovsky, P. Lapébie, E. Corre, F. Delsuc, N. King, G. Wörheide, M. Manuel, A large and consistent phylogenomic dataset supports sponges as the sister group to all other animals. *Curr. Biol.* **27**, 958–967 (2017).
42. M. G. Grabherr, B. J. Haas, M. Yassour, J. Z. Levin, D. A. Thompson, I. Amit, X. Adiconis, L. Fan, R. Raychowdhury, Q. Zeng, Z. Chen, E. Mauceli, N. Hacohen, A. Gnirke, N. Rhind, F. di Palma, B. W. Birren, C. Nusbaum, K. Lindblad-Toh, N. Friedman, A. Regev, Trinity: Reconstructing a full-length transcriptome without a genome from RNA-Seq data. *Nat. Biotechnol.* **29**, 644–652 (2011).
43. Y. J. Luo, M. Kanda, R. Koyanagi, K. Hisata, T. Akiyama, H. Sakamoto, T. Sakamoto, N. Satoh, Nemertean and phoronid genomes reveal lophotrochozoan evolution and the origin of bilaterian heads. *Nat. Ecol. Evol.* **2**, 141–151 (2018).
44. D. Petit, E. Teppa, A. M. Mir, D. Vicogne, C. Thisse, B. Thisse, C. Filloux, A. Harduin-Lepers, Integrative view of  $\alpha$ 2,3-sialyltransferases (ST3Gal) molecular and functional evolution in deuterostomes: Significance of lineage-specific losses. *Mol. Biol. Evol.* **32**, 906–927 (2015).
45. T. F. M. Cummings, K. Gori, L. Sanchez-Pulido, G. Gavriilidis, D. Moi, A. R. Wilson, E. Murchison, C. Dessimoz, C. P. Ponting, M. A. Christophorou, Protein citrullination was introduced into animals by horizontal gene transfer from cyanobacteria. *bioRxiv* 10.1101/2020.06.13.150037 (2020).
